# Supplementary material
Source: publisher figshare collection journal article supplement (https://acs.figshare.com/ndownloader/files/3786922)
Supplement: Supplementary file 1 [file 3786922]

SUPPORTING INFORMATION FOR

Bridging Amines with CO<sub>2</sub>:

Organocatalyzed Reduction of CO<sub>2</sub> to Aminals

*Xavier Frogneux, Enguerrand Blondiaux, Pierre Thuéry and Thibault Cantat\**

CEA, IRAMIS, NIMBE, CNRS UMR 3685 91191 Gif-sur-Yvette Cedex, France

E-mail: [thibault.cantat@cea.fr](mailto:thibault.cantat@cea.fr)

|      |                                                                                      |    |
|------|--------------------------------------------------------------------------------------|----|
| 1.   | Experimental details .....                                                           | 3  |
| 1.1. | <i>General considerations</i> .....                                                  | 3  |
| 1.2. | <i>Screening of hydrosilanes</i> .....                                               | 5  |
| 1.3. | <i>Procedure for the <b>TBD</b>-catalyzed formation of symmetrical amins</i> .....   | 5  |
| 1.4. | <i>Procedure for the <b>TBD</b>-catalyzed formation of unsymmetrical amins</i> ..... | 7  |
| 1.5. | <i>Procedure for the <b>TBD</b>-catalyzed coupling of diethyl malonate</i> .....     | 9  |
| 1.6. | <i>Experiments for the reduction of amins to methylamines</i> .....                  | 9  |
| 1.8. | <i>Procedure for the synthesis of amins samples</i> .....                            | 11 |
| 1.9. | <i>Crystallization of amins</i> .....                                                | 13 |
| 2.   | Characterization of amins.....                                                       | 16 |
| 2.1. | <i>In situ NMR data</i> .....                                                        | 16 |
| 2.2. | <i>NMR characterization</i> .....                                                    | 18 |
| 3.   | NMR spectra .....                                                                    | 25 |
| 3.1. | <i><sup>1</sup>H and <sup>13</sup>C NMR spectra of amins</i> .....                   | 25 |
| 3.2. | <i><sup>1</sup>H NMR spectra of crude mixture for mixed amins</i> .....              | 38 |
| 4.   | References .....                                                                     | 43 |

## 1. Experimental details

### 1.1. General considerations

All reactions and manipulations were performed at 20 °C in a recirculating mBraun LabMaster DP inert atmosphere (Ar) drybox and vacuum Schlenk lines. Glassware was dried overnight at 120 °C before use.  $^1\text{H}$  and  $^{13}\text{C}$  NMR spectra were obtained using a Bruker DPX 200 MHz spectrometer. Chemical shifts for  $^1\text{H}$  and  $^{13}\text{C}\{^1\text{H}\}$  NMR spectra were referenced to solvent impurities. Mass spectrometer data were collected on a Shimadzu GCMS-QP2010 Ultra gas chromatograph mass spectrometer equipped with a Supelco SLB<sup>TM</sup>-ms fused silica capillary column (30 m x 0.25 mm x 0.25  $\mu\text{m}$ ). Unless otherwise noted, reagents were purchased from commercial suppliers and dried over 4 Å molecular sieves prior to use. 4 Å molecular sieves (Aldrich) were dried under dynamic vacuum at 250 °C for 48 h prior to use.  $d_8$ -tetrahydrofuran ( $d_8$ -THF) and  $d_8$ -toluene were dried over a sodium(0)/benzophenone mixture and distilled before use.  $\text{CD}_3\text{CN}$  was dried over  $\text{CaH}_2$  and distilled before use. Carbon dioxide was purchased from Messer in a 5.5 purity gas bottle.

**Crystallography.** The data were collected at 150(2) K with a Nonius Kappa-CCD area detector diffractometer<sup>1</sup> using graphite-monochromated Mo  $\text{K}\alpha$  radiation ( $\lambda = 0.71073$  Å). The crystals were introduced into glass capillaries with a protective coating of Paratone-N oil (Hampton Research). The unit cell parameters were determined from ten frames, then refined on all data. The data (combinations of  $\varphi$ - and  $\omega$ -scans with a minimum redundancy of 4 for 90% of the reflections) were processed with HKL2000.<sup>2</sup> Absorption effects in **2h** were corrected empirically with the program SCALEPACK.<sup>2</sup> The structures were solved with SHELXT<sup>3</sup> and refined by full-matrix least-squares on  $F^2$  with SHELXL-2014.<sup>4</sup> All non-hydrogen atoms were refined with anisotropic displacement parameters. The hydrogen atoms were introduced at calculated positions and were treated as riding atoms with an isotropic

displacement parameter equal to 1.2 times that of the parent atom (1.5 for CH<sub>3</sub>, with optimized geometry). Crystal data and structure refinement parameters are given in Table 1. The molecular plots were drawn with ORTEP-3.<sup>5</sup>

## 1.2. Screening of hydrosilanes

Table S1 presents a screening of hydrosilanes for the coupling of amine **1a** to amina **2a** with **TBD** as catalyst (5 mol%).

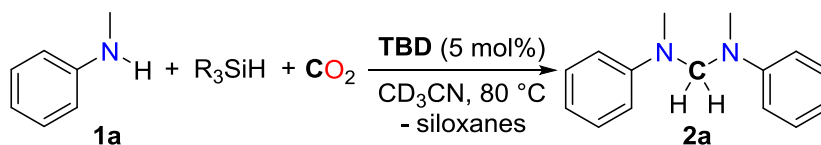

**Table S1.** Screening of hydrosilanes for the coupling of amines into amina

| Entry | Catalyst (mol%) | Reductant                        | Time (h) | Yield (%) |
|-------|-----------------|----------------------------------|----------|-----------|
| 1     | <b>TBD</b> (5)  | PhSiH <sub>3</sub>               | 3.0      | 91        |
| 2     | <b>TBD</b> (5)  | Ph <sub>2</sub> SiH <sub>2</sub> | 5.5      | 80        |
| 3     | <b>TBD</b> (5)  | Et <sub>3</sub> SiH              | 24       | 0         |
| 4     | <b>TBD</b> (5)  | (EtO) <sub>3</sub> SiH           | 24       | 0         |
| 5     | <b>TBD</b> (5)  | PMHS                             | 96       | <5        |
| 6     | <b>TBD</b> (5)  | TMDS                             | 96       | 0         |

Reaction conditions: NMR tube (2.5 mL), catalyst, amine (0.10 mmol), hydrosilane (6 eq. "Si-H"), CD<sub>3</sub>CN (0.30 mL), CO<sub>2</sub> (1 bar). Yields determined by <sup>1</sup>H NMR with Ph<sub>2</sub>CH<sub>2</sub> as internal standard.

## 1.3. Procedure for the TBD-catalyzed formation of symmetrical amina

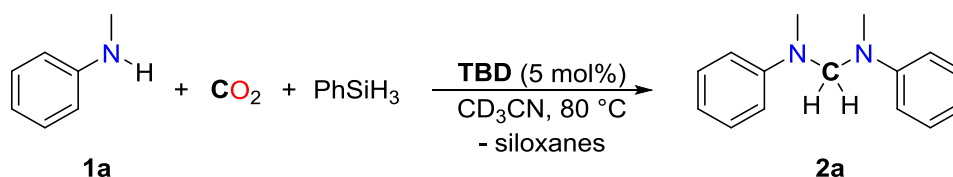

The procedure is detailed for the conversion of *N*-methylaniline (**1a**) to *N,N*-dimethyl-*N,N*-diphenylmethanediamine (**2a**), using **TBD** as catalyst. A 2.5 mL NMR tube equipped with a J. Young valve is charged successively with **TBD** (0.70 mg, 0.0050 mmol, 5 mol%), CD<sub>3</sub>CN (0.30 mL), *N*-methylaniline (10.8 μL, 0.100 mmol, 1 eq), PhSiH<sub>3</sub> (24.7 μL, 0.200 mmol, 2 eq, 6 eq "Si-H") and Ph<sub>2</sub>CH<sub>2</sub> as internal standard (16.7 μL, 0.100 mmol, 1 eq). The reaction mixture is frozen with liquid nitrogen, then degassed, exposed to a carbon dioxide atmosphere (1 bar) and warmed up to RT (under these conditions, CO<sub>2</sub> is introduced at

approximately 1 eq). The flask is sealed and heated to 80 °C. The evolution of the formation of **2a** is monitored by <sup>1</sup>H NMR and the yield is determined using the internal standard.

Procedure for the isolation of amins: the volatiles were removed under *vacuum*. The crude mixture is then purified by flash chromatography over silica gel (*NB: the acidity of the silica gel was quenched by impregnation with 100 mL of the eluent + 10% NEt<sub>3</sub> for 1 h prior to the separation*) (eluent: AcOEt/*n*-pentane: 2/98).

**2s**: 88% isolated yield (white solid, 20 mg, yield over two runs).

**2h**: 84% isolated yield (beige solid, 24.1 mg, yield over two runs).

When an isolated yield was not performed, NMR data of the product were compared with the corresponding amina samples (see section 1.8.) and the yields determined by NMR with respect to the internal standard.

### Scale-up reaction

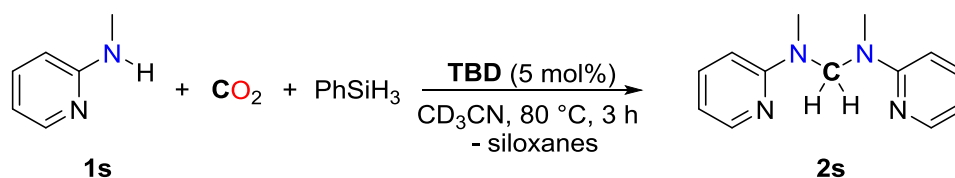

The procedure is detailed for the conversion of 2-aminomethylpyridine (**1s**) to *N,N'*-dimethyl-*N,N'*-di(pyridin-2-yl)methanediamine (**2s**), using **TBD** as catalyst. A 16 mL Schlenk flask equipped with a J. Young valve is charged successively with **TBD** (4.5 mg, 0.032 mmol, 5 mol%), CH<sub>3</sub>CN (1.90 mL), **1s** (65.8 μL, 0.640 mmol, 1 eq), and PhSiH<sub>3</sub> (158 μL, 1.28 mmol, 2 eq, 6 eq "Si-H"). The reaction mixture is frozen with liquid nitrogen, then degassed, exposed to a carbon dioxide atmosphere (1 bar) and warmed up to RT. The flask is sealed and heated to 80 °C. The procedure for the isolation of **2s** is described thereabove. **2s** was obtained as a white powder in 94% isolated yield (68.7 mg).

#### 1.4. Procedure for the TBD-catalyzed formation of unsymmetrical aminals

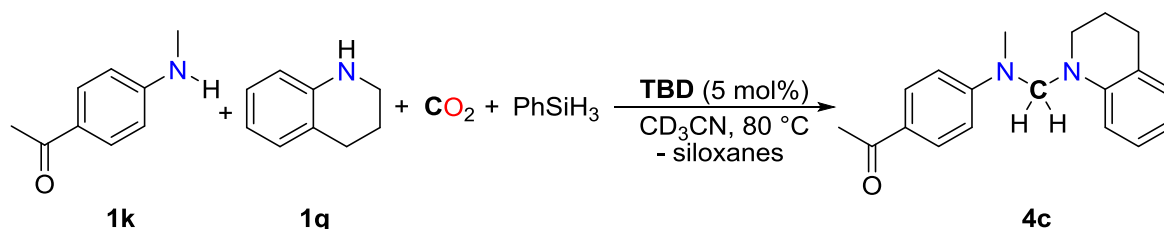

The procedure is detailed for the conversion of 4-acetyl-*N*-methylaniline (**1k**) and 1,2,3,4-tetrahydroquinoline (**1q**) to **4c**, using **TBD** as catalyst. A 2.5 mL NMR tube equipped with a J. Young valve is charged successively with **TBD** (0.70 mg, 0.0050 mmol, 5 mol%), CD<sub>3</sub>CN (0.30 mL), 4-acetyl-*N*-methylaniline (7.5 mg, 0.050 mmol, 0.5 eq), 1,2,3,4-tetrahydroquinoline (6.3 μL, 0.050 mmol, 0.5 eq), PhSiH<sub>3</sub> (24.7 μL, 0.200 mmol, 2 eq, 6 eq "Si-H") and Ph<sub>2</sub>CH<sub>2</sub> as internal standard (16.7 μL, 0.100 mmol, 1 eq). The reaction mixture is frozen with liquid nitrogen, then degassed, exposed to a carbon dioxide atmosphere (1 bar) and warmed up to RT. The flask is sealed and heated to 80 °C. The evolution of the formation of **4c** is monitored by <sup>1</sup>H NMR and the yield and products distribution are determined using the internal standard. See Table S2 below for details. <sup>1</sup>H NMR spectra of the reaction media are provided in section 3.2.

**Table S2.** Yield determination for unsymmetrical amins

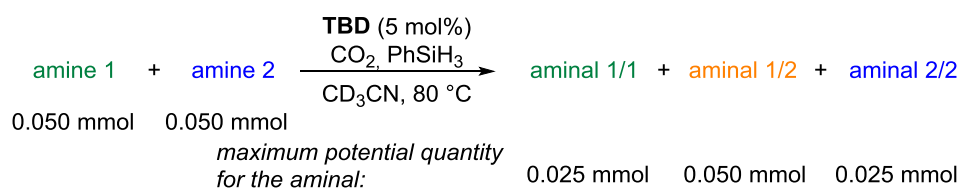

| Entry | Amine 1                                                                             | Consumption (mmol) | Conv. | Amine 2                                                                             | Consumption (mmol) | Conv. | Aminal 1/1 formed (mmol) | Yield 1/1 | Aminal 1/2 formed (mmol) | Yield 1/2 | Aminal 2/2 formed (mmol) | Yield 2/2 |
|-------|-------------------------------------------------------------------------------------|--------------------|-------|-------------------------------------------------------------------------------------|--------------------|-------|--------------------------|-----------|--------------------------|-----------|--------------------------|-----------|
| 1     | 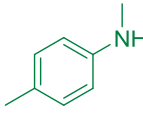   | 0.044              | 88%   |    | 0.044              | 88%   | 0.011                    | 44%       | 0.022                    | 44%       | 0.011                    | 44%       |
| 2     |   | 0.032              | 64%   |   | 0.030              | 60%   | 0.0060                   | 24%       | 0.020                    | 40%       | 0.0050                   | 20%       |
| 3     |  | 0.045              | 90%   |  | 0.047              | 94%   | 0.0050                   | 20%       | 0.035                    | 69%       | 0.0060                   | 24%       |
| 4     |  | 0.044              | 88%   |  | 0.050              | 100%  | 0.0015                   | 6%        | 0.041                    | 82%       | 0.0045                   | 18%       |
| 5     |  | 0.042              | 84%   |  | 0.031              | 62%   | 0.0055                   | 22%       | 0.031                    | 61%       | 0.00                     | 0%        |



### 1.5. Procedure for the TBD-catalyzed coupling of diethyl malonate

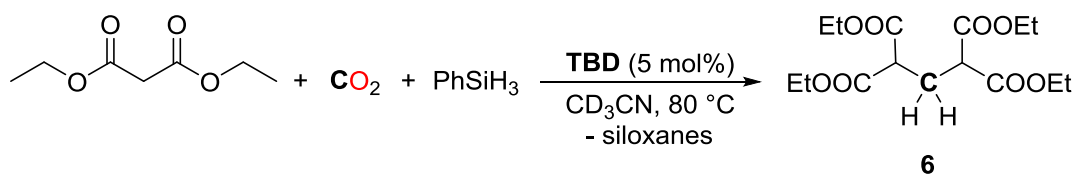

A 2.5 mL NMR tube equipped with a J. Young valve is charged successively with **TBD** (0.70 mg, 0.0050 mmol, 5 mol%), CD<sub>3</sub>CN (0.30 mL), diethyl malonate (15.2 μL, 0.100 mmol, 1 eq), PhSiH<sub>3</sub> (24.7 μL, 0.200 mmol, 2 eq, 6 eq "Si-H") and Ph<sub>2</sub>CH<sub>2</sub> as internal standard (16.7 μL, 0.100 mmol, 1 eq). The reaction mixture is frozen with liquid nitrogen, then degassed, exposed to a carbon dioxide atmosphere (1 bar) and warmed up to RT (under these conditions, CO<sub>2</sub> is introduced at approximately 1 eq). The tube is sealed and heated to 80 °C. The formation of **5** is monitored by <sup>1</sup>H NMR and the yield is determined using the internal standard. NMR data were compared with literature.<sup>6</sup>

### 1.6. Experiments for the reduction of amins to methylamines

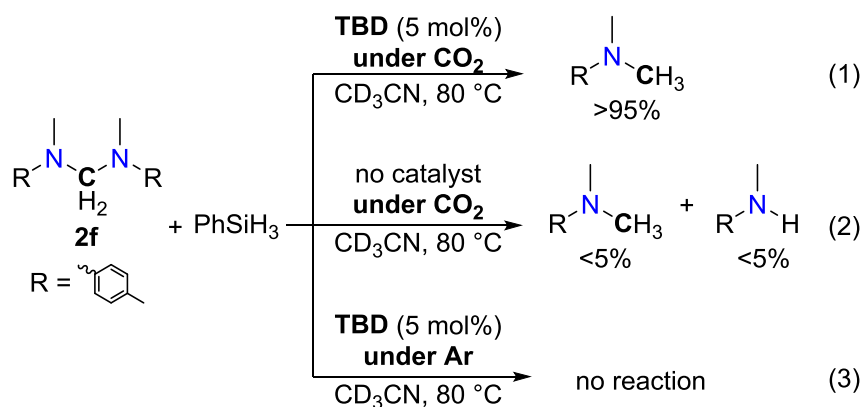

(1). A 2.5 mL NMR tube equipped with a J. Young valve is charged successively with **TBD** (0.70 mg, 0.0050 mmol, 5 mol%), CD<sub>3</sub>CN (0.30 mL), **2f** (see 1.8.) (12.7 mg, 0.050 mmol, 0.5 eq), PhSiH<sub>3</sub> (12.8 μL, 0.100 mmol, 2 eq, 3 eq "Si-H") and Ph<sub>2</sub>CH<sub>2</sub> as internal standard (16.7 μL, 0.100 mmol, 1 eq). The reaction mixture is frozen with liquid nitrogen, degassed, exposed to a carbon dioxide atmosphere (1 bar) and warmed up to RT. The flask is then sealed and heated to 80 °C. The evolution of the formation of *N,N*-dimethyl-

*p*-toluidine and *N*-methyl-*p*-toluidine is followed by  $^1\text{H}$  NMR and the yield is determined using the internal standard.

(2). The same procedure as for (1) is carried out in the absence of **TBD**.

(3). The same procedure as for (1) is carried out under an argon atmosphere.

#### *Discussion:*

To puzzle out the influence of the initial quantity of  $\text{CO}_2$  in the formation of aminals, control experiments to establish the stability of amina species toward an excess of  $\text{CO}_2$  were carried out. Under these conditions, about 1 eq. of  $\text{CO}_2$  with respect to the amine is sufficient to ensure the formation of the amina and its stability towards reduction. However, when the later (**2f**) is put in reaction in the same conditions with fresh  $\text{CO}_2$ , its quantitative reduction to the methyl derivative takes place after 5 h (eq. 1). This reaction is catalyzed by **TBD** since most of the amina remained untouched without it, and only small quantities (<5%) of the corresponding *N*-methylaniline and *N,N*-dimethylaniline were detected (eq. 2). Besides, no reaction occurred when **2f** is mixed with **TBD** and  $\text{PhSiH}_3$  under Ar atmosphere (eq. 3).

### **1.7. Mechanistical investigations**

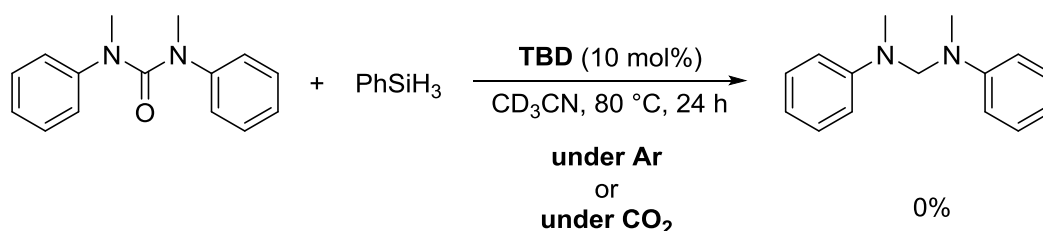

A 2.5 mL NMR tube equipped with a J. Young valve is charged successively with **TBD** (0.70 mg, 0.0050 mmol, 5 mol%), 1,3-dimethyl-1,3-diphenylurea (12 mg, 0.05 mmol)  $\text{CD}_3\text{CN}$  (0.30 mL),  $\text{PhSiH}_3$  (24.7  $\mu\text{L}$ , 0.200 mmol) and  $\text{Ph}_2\text{CH}_2$  as internal standard (16.7  $\mu\text{L}$ , 0.100 mmol, 1 eq). In a first case, the reaction mixture is frozen with liquid nitrogen, degassed, exposed to a carbon dioxide atmosphere (1 bar) and warmed up to RT. The flask is

sealed and heated to 80 °C. In a second case, the reaction was carried out under the glovebox atmosphere (Ar).

#### *Discussion:*

The formation of urea was considered as a possible pathway since its reduction could afford an aminor product. However, control experiments show that **TBD** is not able to promote the hydrosilylation of the tested urea. Under an Ar or CO<sub>2</sub> atmosphere, 1,3-dimethyl-1,3-diphenylurea was found unreacted after 24 h at 80 °C.

### **1.8. Procedure for the synthesis of aminorals samples**

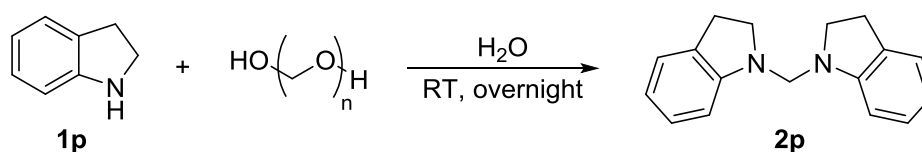

The procedure is detailed for the conversion of indoline (**1p**) to the corresponding aminor **2p**. A 4 mL vial equipped with a magnetic stir bar is charged successively with paraformaldehyde (150.2 mg, 5.00 mmol, 1 eq), indoline (1.120 mL, 10.00 mmol, 2 eq) and distilled water (3 mL). The reaction mixture is sealed and stirred overnight at RT. Distilled water (10 mL) is added and the solution is extracted with AcOEt (2x10 mL). (*NB: Most described aminorals are sensitive to acidic media: a simple work-up with HCl (1 M) is very likely to give the initial amine.*). Organic layers are combined, washed with brine (2x10 mL) and dried with MgSO<sub>4</sub>. The solvents were removed under reduced pressure, affording the aminor **2o** as an orange solid.

- With this method, good conversions to the aminorals **2b**, **2d**, **2e**, **2g**, **2h**, **2i**, **2j**, **2k**, **2l**, **2m**, **2p**, and **2q** were obtained and their NMR data were collected without any further purification.
- **2f** was successfully purified by a flash chromatography on silica gel (eluent: AcOEt/petroleum ether 10/90) without any degradation. **2s** has been isolated by

stirring the silica gel with 10% of Et<sub>3</sub>N in the eluent (AcOEt/petroleum ether: 2/98) for 1 h before the preparation of the column.

- For amins **2g**, **2n** and **2t**, conversions from 20% to 85% were obtained and purification attempts on silica gel were unsuccessful (the starting amine was recovered instead of the desired amination). Selected <sup>1</sup>H NMR data corresponding to the desired compounds were collected (see 3.2.).
- The procedure was inefficient (yield <10%) for **2c**.
- <sup>1</sup>H NMR and <sup>13</sup>C NMR of the following products are identical to reported data: **2a**,<sup>7</sup> **2o**,<sup>8</sup> **2r**<sup>9</sup> and **2u**.<sup>10</sup>

## 1.9. Crystallization of amins

Satisfactory crystals for XRD analysis of **kj** grew in the reaction medium at RT (Figure S4). Crystals of **2f** (Figure S1), **2h** (Figure S2), **2j** (Figure S3), **2l** (Figure S5) and **2q** (Figure S6) were obtained by cooling a saturated CH<sub>3</sub>CN solution of the corresponding amina from 80 °C to 20 °C. Table S3 gathers the associated data to the corresponding structures.

**Table S3.** Crystal Data and Structure Refinement Details

|                                                   | <b>2f</b>                                      | <b>2h</b>                                                      | <b>2j</b>                                      | <b>2k</b>                                                     | <b>2l</b>                                      | <b>2q</b>                                      |
|---------------------------------------------------|------------------------------------------------|----------------------------------------------------------------|------------------------------------------------|---------------------------------------------------------------|------------------------------------------------|------------------------------------------------|
| Chemical formula                                  | C <sub>17</sub> H <sub>22</sub> N <sub>2</sub> | C <sub>15</sub> H <sub>16</sub> Cl <sub>2</sub> N <sub>2</sub> | C <sub>17</sub> H <sub>16</sub> N <sub>4</sub> | C <sub>19</sub> H <sub>22</sub> N <sub>2</sub> O <sub>2</sub> | C <sub>17</sub> H <sub>22</sub> N <sub>2</sub> | C <sub>19</sub> H <sub>22</sub> N <sub>2</sub> |
| <i>M</i> (g mol <sup>-1</sup> )                   | 254.36                                         | 295.20                                                         | 276.34                                         | 310.38                                                        | 254.36                                         | 278.38                                         |
| cryst syst                                        | triclinic                                      | triclinic                                                      | triclinic                                      | triclinic                                                     | triclinic                                      | triclinic                                      |
| space group                                       | <i>P</i> $\bar{1}$                             | <i>P</i> $\bar{1}$                                             | <i>P</i> $\bar{1}$                             | <i>P</i> $\bar{1}$                                            | <i>P</i> $\bar{1}$                             | <i>P</i> $\bar{1}$                             |
| <i>a</i> (Å)                                      | 6.6390(6)                                      | 9.5965(6)                                                      | 9.0980(8)                                      | 7.6950(3)                                                     | 8.2662(8)                                      | 7.4891(4)                                      |
| <i>b</i> (Å)                                      | 10.1221(7)                                     | 9.7098(8)                                                      | 9.2750(5)                                      | 10.8336(4)                                                    | 9.3707(9)                                      | 10.2554(9)                                     |
| <i>c</i> (Å)                                      | 11.8800(12)                                    | 9.8586(8)                                                      | 9.9433(7)                                      | 11.3346(5)                                                    | 9.7747(7)                                      | 10.7397(9)                                     |
| $\alpha$ (deg)                                    | 67.098(5)                                      | 118.511(4)                                                     | 88.510(4)                                      | 115.666(3)                                                    | 93.736(5)                                      | 76.374(4)                                      |
| $\beta$ (deg)                                     | 87.102(4)                                      | 106.751(5)                                                     | 71.674(3)                                      | 91.615(3)                                                     | 107.585(4)                                     | 70.139(5)                                      |
| $\gamma$ (deg)                                    | 75.801(5)                                      | 102.281(4)                                                     | 66.442(4)                                      | 107.985(2)                                                    | 92.110(4)                                      | 88.479(5)                                      |
| <i>V</i> (Å <sup>3</sup> )                        | 712.04(11)                                     | 702.81(11)                                                     | 725.31(10)                                     | 795.48(6)                                                     | 718.96(11)                                     | 752.66(10)                                     |
| <i>Z</i>                                          | 2                                              | 2                                                              | 2                                              | 2                                                             | 2                                              | 2                                              |
| <i>D</i> <sub>calcd</sub> (g cm <sup>-3</sup> )   | 1.186                                          | 1.395                                                          | 1.265                                          | 1.296                                                         | 1.175                                          | 1.228                                          |
| $\mu$ (Mo K $\alpha$ ) (mm <sup>-1</sup> )        | 0.070                                          | 0.449                                                          | 0.078                                          | 0.085                                                         | 0.069                                          | 0.072                                          |
| <i>F</i> (000)                                    | 276                                            | 308                                                            | 292                                            | 332                                                           | 276                                            | 300                                            |
| reflns collcd                                     | 31690                                          | 33874                                                          | 39255                                          | 35475                                                         | 41173                                          | 42158                                          |
| indep reflns                                      | 2672                                           | 2656                                                           | 2730                                           | 3017                                                          | 2705                                           | 2845                                           |
| obsd reflns [ <i>I</i> > 2 $\sigma$ ( <i>I</i> )] | 1734                                           | 1962                                                           | 2192                                           | 2117                                                          | 2215                                           | 2392                                           |
| <i>R</i> <sub>int</sub>                           | 0.026                                          | 0.054                                                          | 0.050                                          | 0.040                                                         | 0.044                                          | 0.031                                          |
| params refined                                    | 176                                            | 174                                                            | 192                                            | 212                                                           | 174                                            | 190                                            |
| <i>R</i> 1                                        | 0.064                                          | 0.037                                                          | 0.041                                          | 0.040                                                         | 0.041                                          | 0.038                                          |
| <i>wR</i> 2                                       | 0.189                                          | 0.103                                                          | 0.119                                          | 0.108                                                         | 0.114                                          | 0.107                                          |
| <i>S</i>                                          | 1.055                                          | 1.049                                                          | 1.046                                          | 1.049                                                         | 1.064                                          | 1.068                                          |
| $\Delta\rho_{\min}$ (e Å <sup>-3</sup> )          | -0.17                                          | -0.23                                                          | -0.16                                          | -0.17                                                         | -0.15                                          | -0.19                                          |
| $\Delta\rho_{\max}$ (e Å <sup>-3</sup> )          | 0.15                                           | 0.27                                                           | 0.17                                           | 0.16                                                          | 0.13                                           | 0.19                                           |

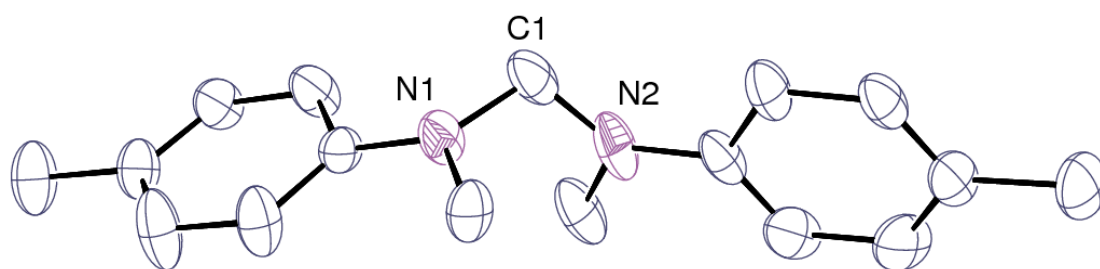

**Figure S1.** View of compound **2f**. Hydrogen atoms are omitted. Displacement ellipsoids are drawn at the 30% probability level.

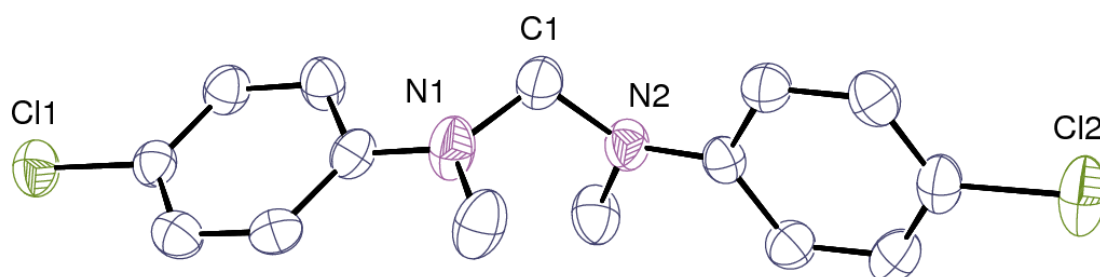

**Figure S2.** View of compound **2h**. Hydrogen atoms are omitted. Displacement ellipsoids are drawn at the 50% probability level.

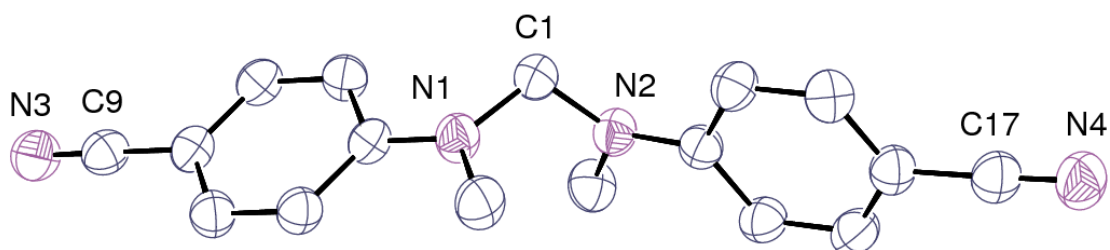

**Figure S3.** View of compound **2j**. Hydrogen atoms are omitted. Displacement ellipsoids are drawn at the 50% probability level.

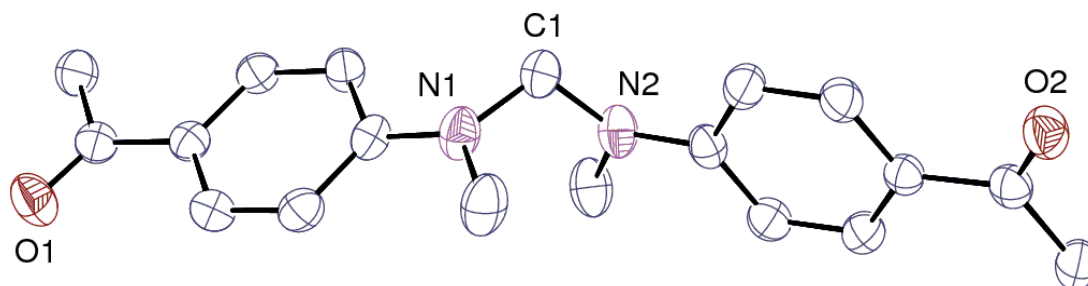

**Figure S4.** View of compound **2k**. Hydrogen atoms are omitted. Displacement ellipsoids are drawn at the 50% probability level.

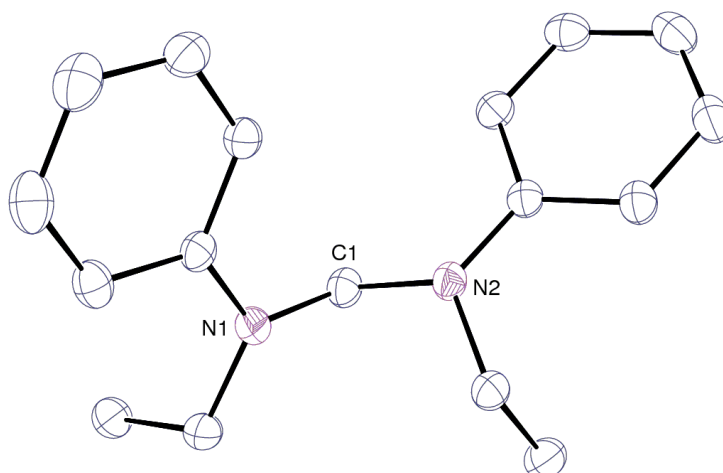

**Figure S5.** View of compound **2l**. Hydrogen atoms are omitted. Displacement ellipsoids are drawn at the 30% probability level.

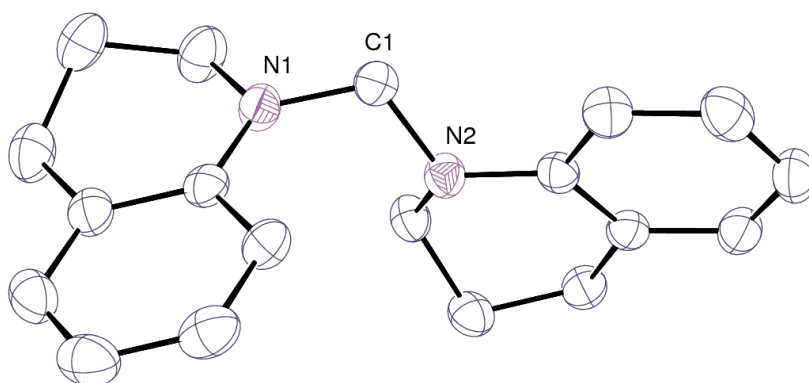

**Figure S6.** View of compound **2q**. Hydrogen atoms are omitted. Displacement ellipsoids are drawn at the 50% probability level.

## 2. Characterization of aminals

### 2.1. *In situ* NMR data

The following tables 4-6 present the *in situ*  $^1\text{H}$  NMR data for the  $\text{N}-\text{CH}_2-\text{N}$  group of the aminals in  $\text{CD}_3\text{CN}$ .

**Table S4.** Symmetrical aminals **2a-2o**

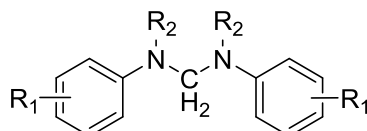

| Aminal    | R <sub>1</sub> | R <sub>2</sub> | $\delta$ N-CH <sub>2</sub> -N<br>in CD <sub>3</sub> CN<br>(ppm) |
|-----------|----------------|----------------|-----------------------------------------------------------------|
| <b>2a</b> | H              | Me             | 4.77                                                            |
| <b>2b</b> | 3-Me           | Me             | 4.76                                                            |
| <b>2c</b> | 3-OMe          | Me             | 4.79                                                            |
| <b>2d</b> | 3-Cl           | Me             | 4.73                                                            |
| <b>2e</b> | 3-F            | Me             | 4.78                                                            |
| <b>2f</b> | 4-Me           | Me             | 4.68                                                            |
| <b>2g</b> | 4-OMe          | Me             | 4.54                                                            |
| <b>2h</b> | 4-Cl           | Me             | 4.69                                                            |
| <b>2i</b> | 4-F            | Me             | 4.63                                                            |
| <b>2j</b> | 4-CN           | Me             | 4.89                                                            |
| <b>2k</b> | 4-Ac           | Me             | 4.95                                                            |
| <b>2l</b> | H              | Et             | 4.73                                                            |
| <b>2m</b> | H              | Allyl          | 4.86                                                            |
| <b>2n</b> | H              | Ph             | 5.50                                                            |
| <b>2o</b> | H              | Bn             | 5.13                                                            |

**Table S5.** Symmetrical amins **2p-2u**

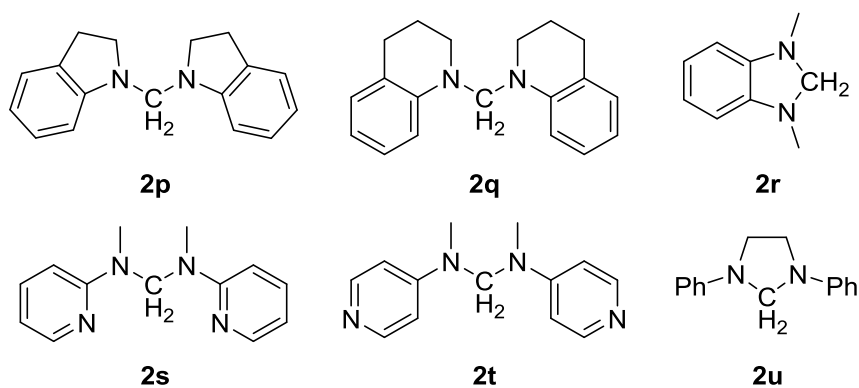



| Aminal | $\delta$ N-CH <sub>2</sub> -N<br>in CD <sub>3</sub> CN<br>(ppm) |
|--------|-----------------------------------------------------------------|
| 2p     | 4.52                                                            |
| 2q     | 4.67                                                            |
| 2r     | 4.21                                                            |
| 2s     | 5.56                                                            |
| 2t     | 4.90                                                            |
| 2u     | 4.62                                                            |

**Table S6:** Mixed amins 4a-4e

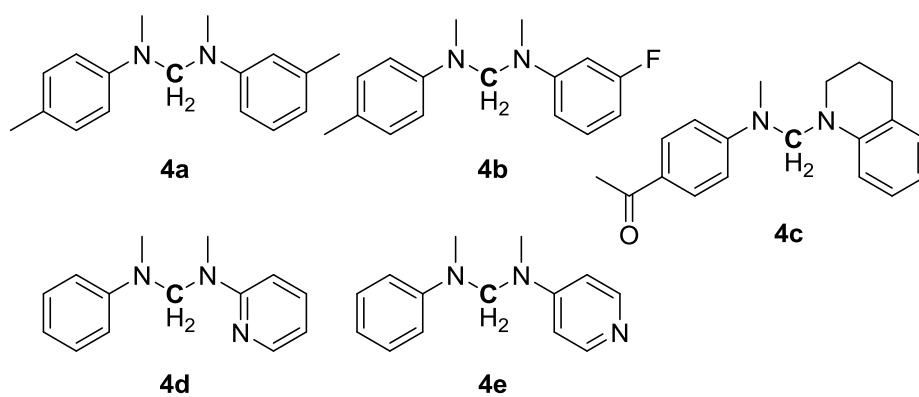

| Aminal | $\delta$ N-CH <sub>2</sub> -N<br>in CD <sub>3</sub> CN.<br>(ppm) |
|--------|------------------------------------------------------------------|
| 4a     | 4.71                                                             |
| 4b     | 4.71                                                             |
| 4c     | 4.81                                                             |
| 4d     | 5.22                                                             |
| 4e     | 4.83                                                             |

## 2.2. NMR characterization

- **2a:** *N,N'*-dimethyl-*N,N'*-diphenylmethanedianiline

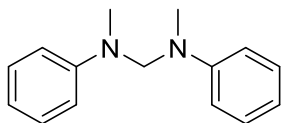

NMR data for **2a** are reported from literature.<sup>7</sup>

**<sup>1</sup>H NMR** (CDCl<sub>3</sub>, 298 K):  $\delta$  2.85 (s, 6H, NCH<sub>3</sub>); 4.70 (s, 2H, NCH<sub>2</sub>N); 6.60–7.45 (m, 10H, Ar).

**<sup>13</sup>C NMR** (CDCl<sub>3</sub>, 298 K):  $\delta$  36.06 (NCH<sub>3</sub>); 70.11 (NCH<sub>2</sub>N); 113.56 (Ar–C2, Ar–C6); 117.68 (Ar–C4); 129.10 (Ar–C3, Ar–C5); 149.11 (Ar–C1).

- **2b:** *N,N'*-dimethyl-*N,N'*-di-*m*-tolylmethanedianiline

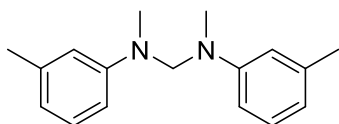

**Appearance:** pale oil

**<sup>1</sup>H NMR** (CDCl<sub>3</sub>, 298 K):  $\delta$  2.38 (s, 6H, NCH<sub>3</sub>); 2.93 (s, 6H, PhCH<sub>3</sub>); 4.81 (s, 2H, NCH<sub>2</sub>N); 6.66–6.71 (m, 6H, Ar); 7.17–7.25 (m, 2H, Ar).

**<sup>13</sup>C NMR** (CDCl<sub>3</sub>, 298 K):  $\delta$  22.00 (PhCH<sub>3</sub>); 36.29 (NCH<sub>3</sub>); 70.49 (NCH<sub>2</sub>N); 110.95 (Ar); 114.53 (Ar); 118.75 (Ar); 129.15 (Ar); 138.97 (Ar); 149.47 (Ar).

**Anal. Calc.** for C<sub>17</sub>H<sub>22</sub>N<sub>2</sub> (mol. wt. 254.38): C 80.27; H 8.72; N 11.01. Found: C 79.09; H 8.84; N 11.07.

- **2d:** *N,N'*-bis(3-chlorophenyl)-*N,N'*-dimethylmethanedianiline

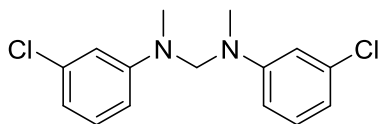

**Appearance:** white solid

**<sup>1</sup>H NMR** (CDCl<sub>3</sub>, 298 K):  $\delta$  2.87 (s, 6H, NCH<sub>3</sub>); 4.75 (s, 2H, NCH<sub>2</sub>N); 6.68–6.80 (m, 6H, Ar); 7.13–7.22 (m, 2H, Ar).

**<sup>13</sup>C NMR** (CDCl<sub>3</sub>, 298 K):  $\delta$  36.29 (NCH<sub>3</sub>); 69.53 (NCH<sub>2</sub>N); 111.73 (Ar); 113.50 (Ar); 117.84 (Ar); 130.27 (Ar); 135.17 (Ar); 150.10 (Ar).

**Anal. Calc.** for C<sub>15</sub>H<sub>16</sub>Cl<sub>2</sub>N<sub>2</sub> (mol. wt. 295.21): C 61.03; H 5.46; Cl 24.02; N 9.49. Found: C 60.89; H 5.48; Cl not measured; N 9.48.

- **2e:** *N,N'*-bis(3-fluorophenyl)-*N,N'*-dimethylmethanedi-amine

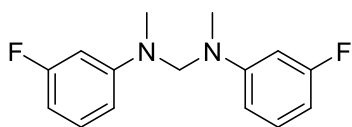

**Appearance:** pale orange solid

**<sup>1</sup>H NMR** (CDCl<sub>3</sub>, 298 K): δ 2.88 (s, 6H, NCH<sub>3</sub>); 4.75 (s, 2H, NCH<sub>2</sub>N); 6.50–6.61 (m, 6H, Ar); 7.14–7.23 (m, 2H, Ar).

**<sup>13</sup>C NMR** (CDCl<sub>3</sub>, 298 K): δ 36.26 (NCH<sub>3</sub>); 69.50 (NCH<sub>2</sub>N); 100.54 (Ar, <sup>2</sup>J<sub>CF</sub> = 25.6 Hz); 100.36 (Ar, <sup>2</sup>J<sub>CF</sub> = 22.2 Hz); 109.04 (Ar, <sup>4</sup>J<sub>CF</sub> = 2.2 Hz); 130.38 (Ar, <sup>3</sup>J<sub>CF</sub> = 10.2 Hz); 150.75 (Ar, <sup>3</sup>J<sub>CF</sub> = 10.8 Hz); 164.09 (Ar, <sup>1</sup>J<sub>CF</sub> = 242 Hz).

- **2f:** *N,N'*-dimethyl-*N,N'*-di-*p*-tolylmethanedi-amine

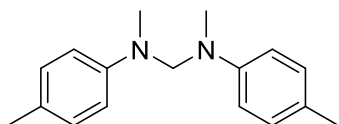

**Appearance:** pale brownish solid

**<sup>1</sup>H NMR** (CDCl<sub>3</sub>, 298 K): δ 2.29 (s, 6H, PhCH<sub>3</sub>); 2.86 (s, 6H, NCH<sub>3</sub>); 4.70 (s, 2H, NCH<sub>2</sub>N); 6.80 (d, 4H, Ar, <sup>3</sup>J<sub>HH</sub> = 8.0 Hz); 7.08 (d, 4H, Ar, <sup>3</sup>J<sub>HH</sub> = 8.0 Hz).

**<sup>13</sup>C NMR** (CDCl<sub>3</sub>, 298 K): δ 20.42 (6H, PhCH<sub>3</sub>); 36.62 (6H, NCH<sub>3</sub>); 71.42 (2H, NCH<sub>2</sub>N); 114.13 (Ar); 127.07 (Ar); 129.77 (Ar); 147.30 (Ar).

**Anal. Calc.** for C<sub>17</sub>H<sub>22</sub>N<sub>2</sub> (mol. wt. 254.38): C 80.27; H 8.72; N 11.01. Found: C 80.35; H 8.98; N 11.20.

- **2g:** *N,N'*-bis(4-methoxyphenyl)-*N,N'*-dimethylmethanedi-amine

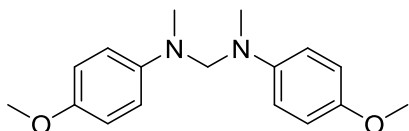

Selected <sup>1</sup>H NMR data (see 1.8.).

**<sup>1</sup>H NMR** (CDCl<sub>3</sub>, 298 K): δ 2.85 (s, 6H, NCH<sub>3</sub>); 3.79 (s, 6H, OCH<sub>3</sub>); 4.57 (s, 2H, NCH<sub>2</sub>N); 6.61 (d, 4H, Ar, <sup>3</sup>J<sub>HH</sub> = 8.8 Hz); 6.83 (d, 4H, Ar, <sup>3</sup>J<sub>HH</sub> = 8.8 Hz).

**<sup>13</sup>C NMR** (CDCl<sub>3</sub>, 298 K): δ 37.55 (NCH<sub>3</sub>); 55.77 (OCH<sub>3</sub>); 73.89 (NCH<sub>2</sub>N); 113.68 (Ar); 114.84 (Ar); 116.18 (Ar); 144.00 (Ar).

- **2h:** *N,N'*-bis(4-chlorophenyl)-*N,N'*-dimethylmethanedi-amine

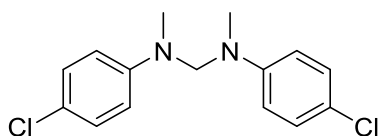

**Appearance:** beige solid

**<sup>1</sup>H NMR** (CDCl<sub>3</sub>, 298 K): δ 2.86 (s, 6H, NCH<sub>3</sub>); 4.71 (s, 2H, NCH<sub>2</sub>N); 6.73 (d, 4H, Ar, <sup>3</sup>J<sub>HH</sub> = 8.8 Hz); 7.20 (d, 4H, Ar, <sup>3</sup>J<sub>HH</sub> = 8.8 Hz).

**<sup>13</sup>C NMR** (CDCl<sub>3</sub>, 298 K): δ 36.68 (NCH<sub>3</sub>); 70.51 (NCH<sub>2</sub>N); 114.96 (Ar); 122.93 (Ar); 129.14 (Ar); 147.69 (Ar).

**Anal. Calc.** for C<sub>15</sub>H<sub>16</sub>Cl<sub>2</sub>N<sub>2</sub> (mol. wt. 295.21): C 61.03; H 5.46; Cl 24.02; N 9.49. Found: C 60.91; H 5.47; Cl not measured; N 9.54.

- **2i:** *N,N'*-bis(4-fluorophenyl)-*N,N'*-dimethylmethanedi-amine

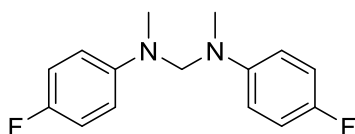

**Appearance:** beige solid

**<sup>1</sup>H NMR** (CDCl<sub>3</sub>, 298 K): δ 2.87 (s, 6H, NCH<sub>3</sub>); 4.63 (s, 2H, NCH<sub>2</sub>N); 6.71-6.89 (m, 4H, Ar); 6.90-7.10 (m, 4H, Ar).

**<sup>13</sup>C NMR** (CDCl<sub>3</sub>, 298 K): δ 37.33 (NCH<sub>3</sub>); 72.75 (NCH<sub>2</sub>N); 115.53 (Ar, <sup>3</sup>J<sub>CF</sub> = 8.3 Hz); 115.66 (Ar, <sup>2</sup>J<sub>CF</sub> = 21.8 Hz); 145.94 (Ar, <sup>4</sup>J<sub>CF</sub> = 1.4 Hz); 156.32 (Ar, <sup>1</sup>J<sub>CF</sub> = 242 Hz).

- **2j:** *4,4'*-(methylenebis(methylazanediyl))dibenzonitrile

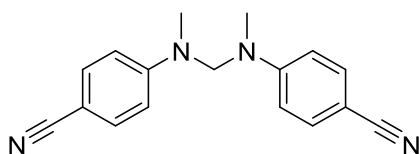

**Appearance:** white solid

**<sup>1</sup>H NMR** (CDCl<sub>3</sub>, 298 K): δ 2.87 (s, 6H, NCH<sub>3</sub>); 4.84 (s, 2H, NCH<sub>2</sub>N); 6.66 (d, 4H, Ar, <sup>3</sup>J<sub>HH</sub> = 8.8 Hz); 7.38 (d, 4H, Ar, <sup>3</sup>J<sub>HH</sub> = 8.8 Hz).

**<sup>13</sup>C NMR** (CDCl<sub>3</sub>, 298 K): δ 35.96 (NCH<sub>3</sub>); 67.41 (NCH<sub>2</sub>N); 99.51 (Ar); 112.56 (Ar); 120.07 (CN); 133.59 (Ar); 151.12 (Ar).

**Anal. Calc.** for  $C_{17}H_{16}N_4$  (mol. wt. 276.34): C 73.89; H 5.84; N 20.27. Found: C 73.56; H 5.81; N 20.49.

- **2k:** 1,1'-((methylenebis(methylazanediyl))bis(4,1-phenylene))bis(ethan-1-one)

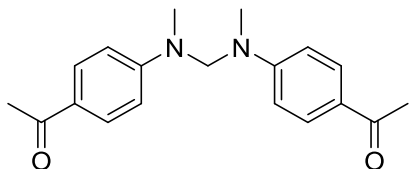

**Appearance:** mustard yellow solid

**$^1H$  NMR** ( $CDCl_3$ , 298 K):  $\delta$  2.50 (s, 6H,  $COCH_3$ ); 2.95 (s, 6H,  $NCH_3$ ); 4.96 (s, 2H,  $NCH_2N$ ); 6.74 (d, 4H, Ar,  $^3J_{HH} = 8.5$  Hz); 7.87 (d, 4H, Ar,  $^3J_{HH} = 8.5$  Hz).

**$^{13}C$  NMR** ( $CDCl_3$ , 298 K):  $\delta$  26.16 ( $COCH_3$ ); 36.02 ( $NCH_3$ ); 67.60 ( $NCH_2N$ ); 111.76 (Ar); 126.98 (Ar); 130.66 (Ar); 152.08 (Ar); 196.54 ( $COCH_3$ ).

**Anal. Calc.** for  $C_{19}H_{22}N_2O_2$  (mol. wt. 310.40): C 73.52; H 7.14; N 9.03; O 10.31. Found: C 73.06; H 7.20; N 9.12; O not measured.

- **2l:** *N,N'*-diethyl-*N,N'*-diphenylmethanedi-amine

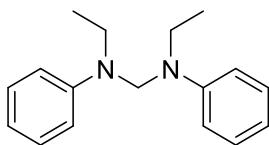

**Appearance:** peach solid

**$^1H$  NMR** ( $CDCl_3$ , 298 K):  $\delta$  1.13 (t, 6H,  $NCH_2CH_3$ ,  $^3J_{HH} = 6.9$  Hz); 3.42 (q, 4H,  $NCH_2CH_3$ ,  $^3J_{HH} = 6.9$  Hz); 4.72 (s, 2H,  $NCH_2N$ ); 6.76–7.86 (m, 6H, Ar); 7.21–7.28 (m, 4H, Ar).

**$^{13}C$  NMR** ( $CDCl_3$ , 298 K):  $\delta$  11.98 ( $NCH_2CH_3$ ); 42.20 ( $NCH_2CH_3$ ); 65.66 ( $NCH_2N$ ); 113.94 (Ar); 117.43 (Ar); 129.37 (Ar); 147.81 (Ar).

**Anal. Calc.** for  $C_{17}H_{22}N_2$  (mol. wt. 254.38): C 80.27; H 8.72; N 11.01. Found: C 80.27; H 8.90; N 11.20.

- **2m:** *N,N'*-diallyl-*N,N'*-diphenylmethanedi-amine

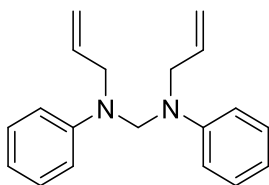

**Appearance:** brown oil

**<sup>1</sup>H NMR** (CDCl<sub>3</sub>, 298 K): δ 4.36 (s, 4H, NCH<sub>2</sub>CHCH<sub>2</sub>, <sup>3</sup>J<sub>HH</sub> = 4.0 Hz); 4.87 (s, 2H, NCH<sub>2</sub>N); 5.13–5.22 (m, 4H, NCH<sub>2</sub>CHCH<sub>2</sub>); 5.79–5.97 (m, 2H, NCH<sub>2</sub>CHCH<sub>2</sub>); 6.80–6.96 (m, 4H, Ar); 7.23–7.30 (m, 6H, Ar).

**<sup>13</sup>C NMR** (CDCl<sub>3</sub>, 298 K): δ 50.06 (NCH<sub>2</sub>CHCH<sub>2</sub>); 65.83 (NCH<sub>2</sub>N); 100.08 (Ar); 113.87 (Ar); 116.47 (NCH<sub>2</sub>CHCH<sub>2</sub>); 117.80 (NCH<sub>2</sub>CHCH<sub>2</sub>); 129.32 (Ar); 134.06 (NCH<sub>2</sub>CHCH<sub>2</sub>); 148.22 (Ar).

**Anal. Calc.** for C<sub>19</sub>H<sub>22</sub>N<sub>2</sub> (mol. wt. 278.40): C 81.97; H 7.97; N 10.06. Found: C 81.24; H 7.97; N 10.08.

- **2n: N,N,N',N'-tetraphenylmethanedianiline**

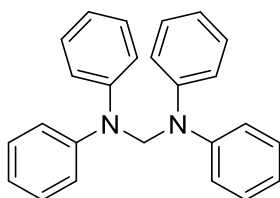

Selected <sup>1</sup>H NMR data (see 1.8.).

**<sup>1</sup>H NMR** (CDCl<sub>3</sub>, 298 K): δ 5.56 (s, 2H, NCH<sub>2</sub>N); 6.93–7.38 (m, 20H, Ar).

- **2o: N,N'-dibenzyl-N,N'-diphenylmethanedianiline**

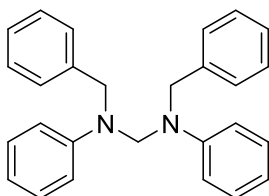

NMR data for **2o** are reported from literature.<sup>8</sup>

**<sup>1</sup>H NMR** (CDCl<sub>3</sub>, 298 K): δ 2.21 (s, 4H, NCH<sub>2</sub>); 4.37 (s, 2H, NCH<sub>2</sub>N); 6.71–7.43 (m, 20H, Ar).

**<sup>13</sup>C NMR** (CDCl<sub>3</sub>, 298 K): δ 60.42 (NCH<sub>2</sub>); 77.35 (NCH<sub>2</sub>N); 113.40 (Ar); 118.10 (Ar); 127.34 (Ar); 127.70 (Ar); 128.66 (Ar); 129.30 (Ar); 139.05 (Ar); 147.57 (Ar).

- **2p: di(indolin-1-yl)methane**

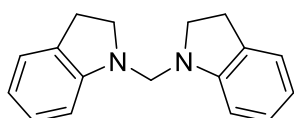

**Appearance:** persian orange solid

**<sup>1</sup>H NMR** (CDCl<sub>3</sub>, 298 K): δ 3.10 (t, 4H, CH<sub>2</sub>, <sup>3</sup>J<sub>HH</sub> = 8.4 Hz); 3.59 (t, 4H, CH<sub>2</sub>, <sup>3</sup>J<sub>HH</sub> = 8.4 Hz); 4.63 (s, 2H, NCH<sub>2</sub>N); 6.78–6.88 (m, 4H, Ar); 7.19–7.26 (m, 4H, Ar).

**<sup>13</sup>C NMR** (CDCl<sub>3</sub>, 298 K): δ 28.63 (NCH<sub>2</sub>CH<sub>2</sub>); 52.71 (NCH<sub>3</sub>CH<sub>2</sub>); 63.97 (NCH<sub>2</sub>N); 107.30 (Ar); 118.06 (Ar); 124.81 (Ar); 127.39 (Ar); 130.02 (Ar); 151.61 (Ar).

**Anal. Calc.** for C<sub>17</sub>H<sub>18</sub>N<sub>2</sub> (mol. wt. 250.36): C 81.56; H 7.25; N 11.19. Found: C 81.40; H 7.19; N 11.34.

- **2q: bis(3,4-dihydroquinolin-1(2H)-yl)methane**

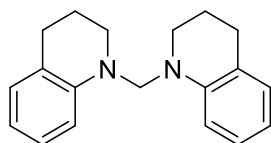

**Appearance:** persian orange solid

**<sup>1</sup>H NMR** (CDCl<sub>3</sub>, 298 K): δ 1.96 (tt, 4H, CH<sub>2</sub>, <sup>3</sup>J<sub>HH</sub> = 6.2 Hz, <sup>3</sup>J<sub>HH</sub> = 5.5 Hz); 2.80 (t, 4H, CH<sub>2</sub>, <sup>3</sup>J<sub>HH</sub> = 6.2 Hz); 3.31 (tt, 4H, CH<sub>2</sub>, <sup>3</sup>J<sub>HH</sub> = 5.5 Hz); 4.73 (s, 2H, NCH<sub>2</sub>N); 6.63–6.77 (m, 4H, Ar); 7.01–7.12 (m, 4H, Ar).

**<sup>13</sup>C NMR** (CDCl<sub>3</sub>, 298 K): δ 22.18 (NCH<sub>2</sub>CH<sub>2</sub>CH<sub>2</sub>); 28.26 (NCH<sub>2</sub>CH<sub>2</sub>CH<sub>2</sub>); 47.01 (NCH<sub>2</sub>CH<sub>2</sub>CH<sub>2</sub>); 67.53 (NCH<sub>2</sub>N); 111.53 (Ar); 116.74 (Ar); 123.24 (Ar); 127.22 (Ar); 129.32 (Ar); 145.00 (Ar).

**Anal. Calc.** for C<sub>19</sub>H<sub>22</sub>N<sub>2</sub> (mol. wt. 278.40): C 81.97; H 7.97; N 10.06. Found: C 81.46; H 8.14; N 10.35.

- **2r: 1,3-dimethyl-2,3-dihydro-1H-benzo[d]imidazole**

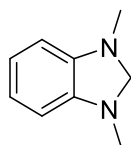

NMR data for **2r** are reported from literature.<sup>9</sup>

**<sup>1</sup>H NMR** (CDCl<sub>3</sub>, 298 K): δ 2.74 (s, 6H, NCH<sub>3</sub>); 4.33 (s, 2H, NCH<sub>2</sub>N); 6.43 (dd, 2H, Ar); 6.69 (dd, 2H, Ar).

**<sup>13</sup>C NMR** (CDCl<sub>3</sub>, 298 K): δ 34.29 (NCH<sub>3</sub>); 80.19 (NCH<sub>2</sub>N); 105.97 (Ar); 119.05 (Ar); 143.12 (Ar).

- **2s: N,N'-dimethyl-N,N'-di(pyridin-2-yl)methanedi-amine**

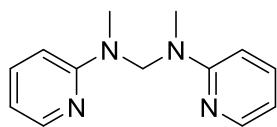

**Appearance:** white solid

**$^1\text{H}$  NMR** ( $\text{CDCl}_3$ , 298 K):  $\delta$  2.99 (s, 6H,  $\text{NCH}_3$ ); 5.61 (s, 2H,  $\text{NCH}_2\text{N}$ ); 6.54–6.62 (m, 4H, Ar); 7.46–7.50 (m, 2H, Ar); 8.17–8.19 (m, 2H, Ar).

**$^{13}\text{C}$  NMR** ( $\text{CDCl}_3$ , 298 K):  $\delta$  34.76 ( $\text{NCH}_3$ ); 61.59 ( $\text{NCH}_2\text{N}$ ); 105.95 (Ar); 112.46 (Ar); 137.57 (Ar); 147.78 (Ar); 159.00 (Ar).

**Anal. Calc.** for  $\text{C}_{13}\text{H}_{16}\text{N}_4$  (mol. wt. 228.30): C 68.39; H 7.06; N 24.54. Found: C 68.13; H 7.04; N 24.69.

- **2t:** *N,N'*-dimethyl-*N,N'*-di(pyridin-4-yl)methanediamine

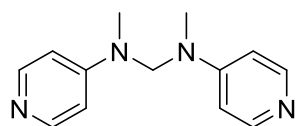

Selected  $^1\text{H}$  NMR data (see 1.8.).

**$^1\text{H}$  NMR** ( $\text{CDCl}_3$ , 298 K):  $\delta$  2.84 (s, 6H,  $\text{NCH}_3$ ); 4.97 (s, 2H,  $\text{NCH}_2\text{N}$ ); 6.41 (d, 4H, Ar,  $^3J_{HH} = 6.1$  Hz); 8.15 (d, 4H, Ar,  $^3J_{HH} = 6.1$  Hz).

- **2u:** 1,3-diphenylimidazolidine

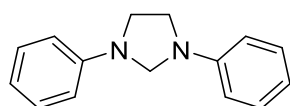

NMR data for **2u** are reported from literature.<sup>10</sup>

**Appearance:** colorless plates

**$^1\text{H}$  NMR** ( $\text{CDCl}_3$ , 298 K):  $\delta$  3.66 (s, 4H,  $\text{NCH}_2\text{CH}_2\text{N}$ ); 4.67 (s, 2H,  $\text{NCH}_2\text{N}$ ); 6.68 (d, 4H, Ar,  $^3J_{HH} = 8.1$  Hz); 6.80 (t, 2H, Ar,  $^3J_{HH} = 7.3$  Hz); 7.30 (d, 4H, Ar,  $^3J_{HH} = 7.7$  Hz).

**$^{13}\text{C}$  NMR** ( $\text{C}_6\text{D}_6$ , 298 K):  $\delta$  46.47 ( $\text{NCH}_2\text{CH}_2\text{N}$ ); 65.85 ( $\text{NCH}_2\text{N}$ ); 112.44 (Ar); 117.64 (Ar); 129.36 (Ar); 146.41 (Ar).



### 3. NMR spectra

#### 3.1. $^1\text{H}$ and $^{13}\text{C}$ NMR spectra of amins

- **2b:** *N,N'*-dimethyl-*N,N'*-di-*m*-tolylmethanediamine

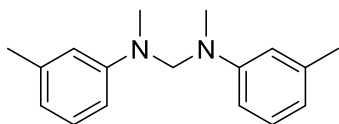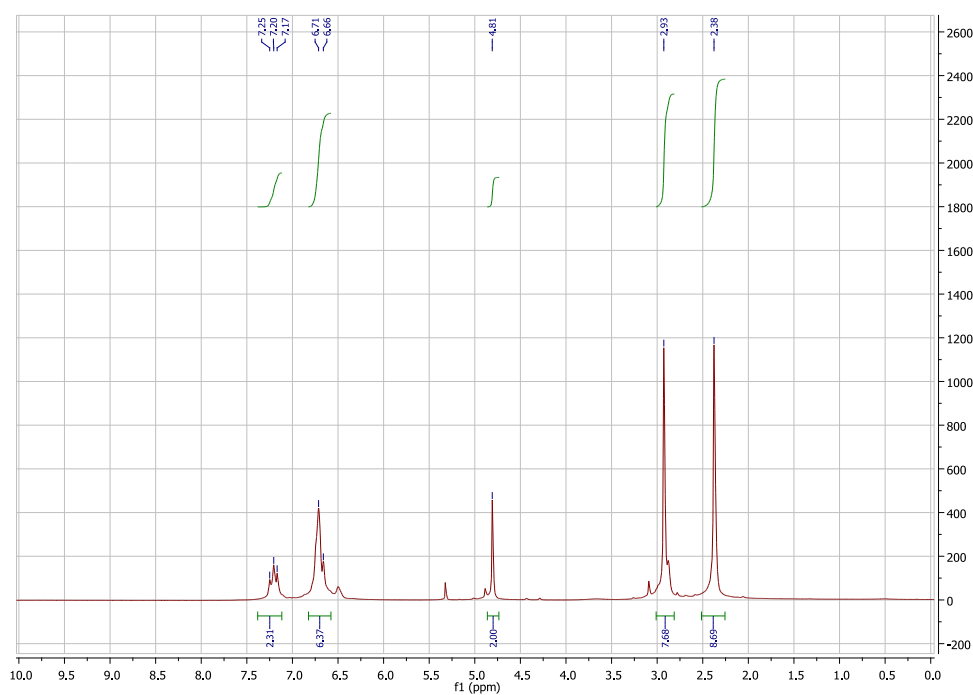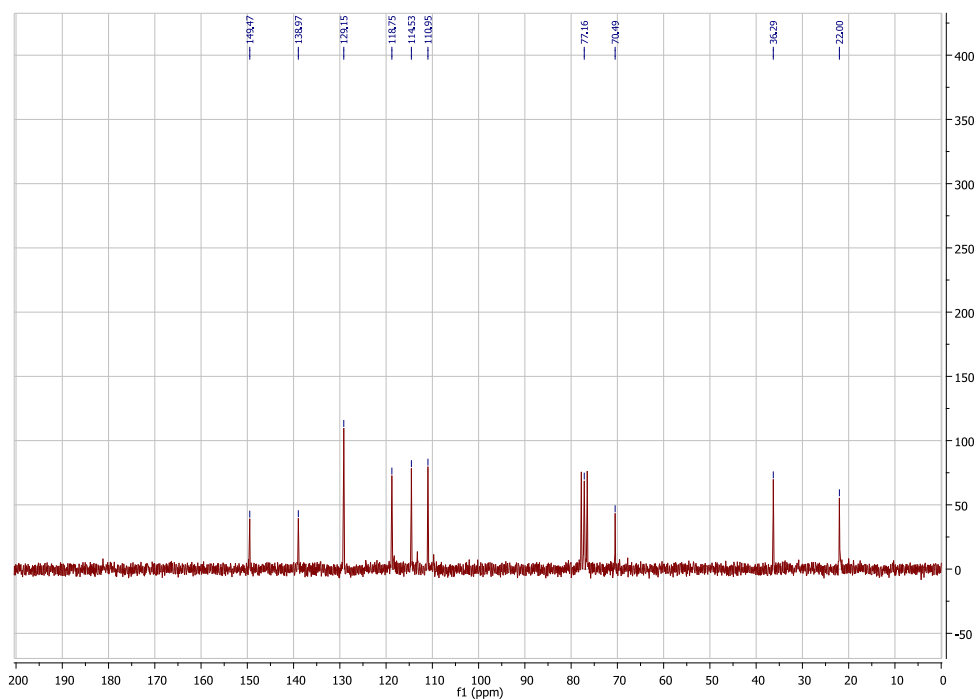

- **2d:** *N,N'*-bis(3-chlorophenyl)-*N,N'*-dimethylmethanedi-amine

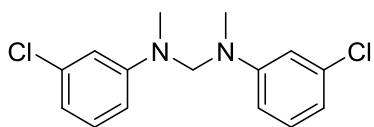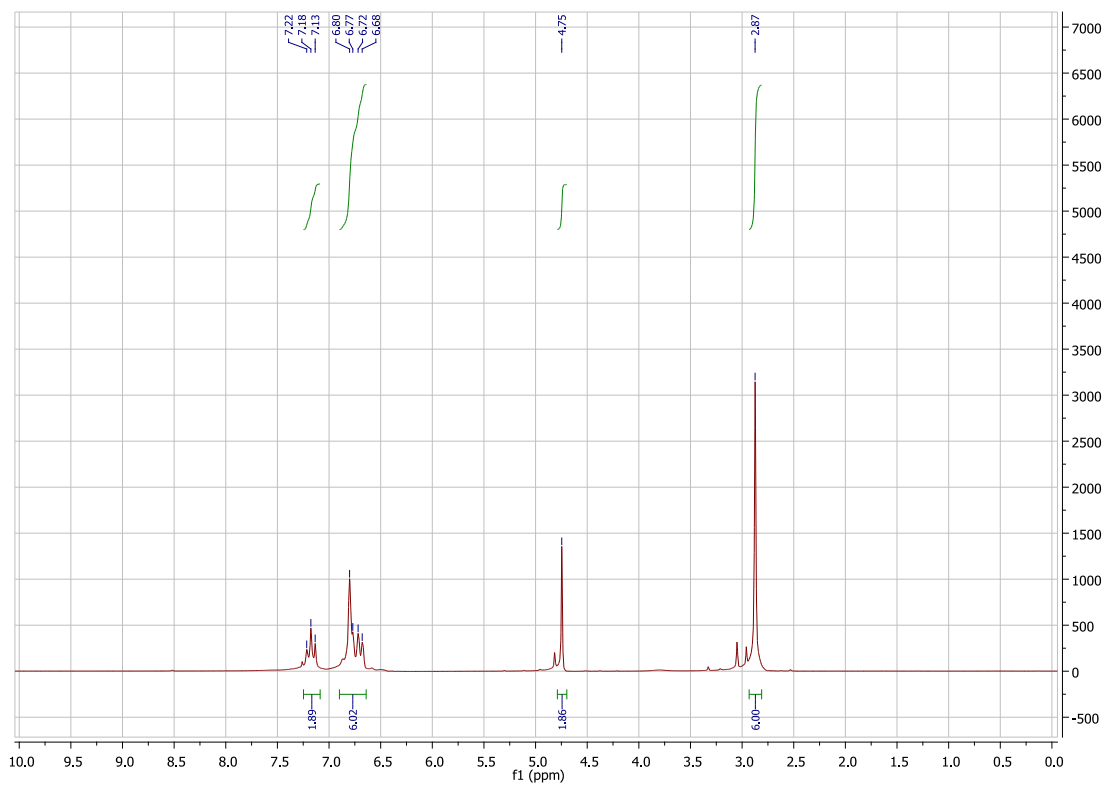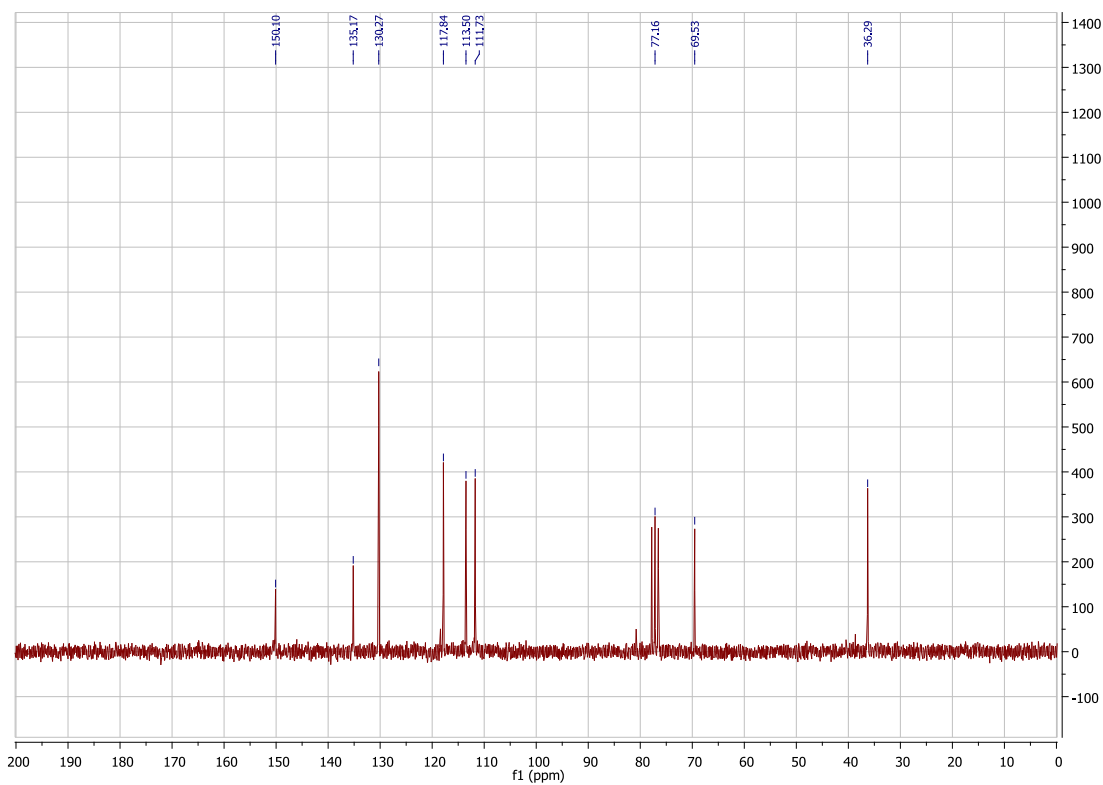

- **2e:** *N,N'*-bis(3-fluorophenyl)-*N,N'*-dimethylmethanedi-amine

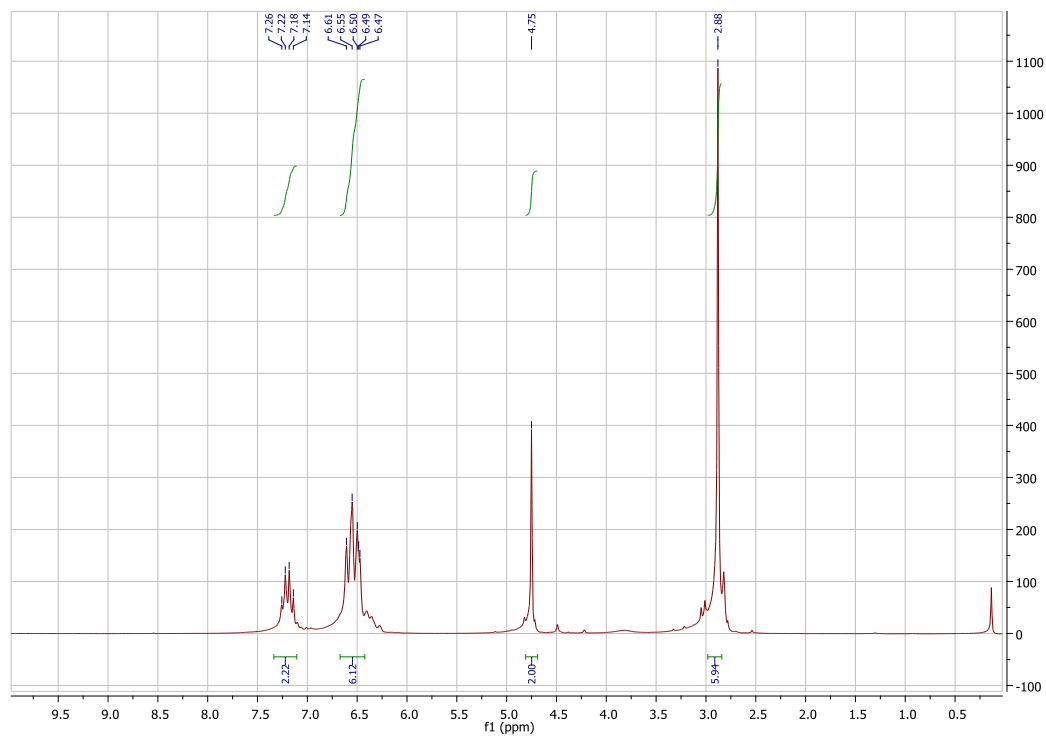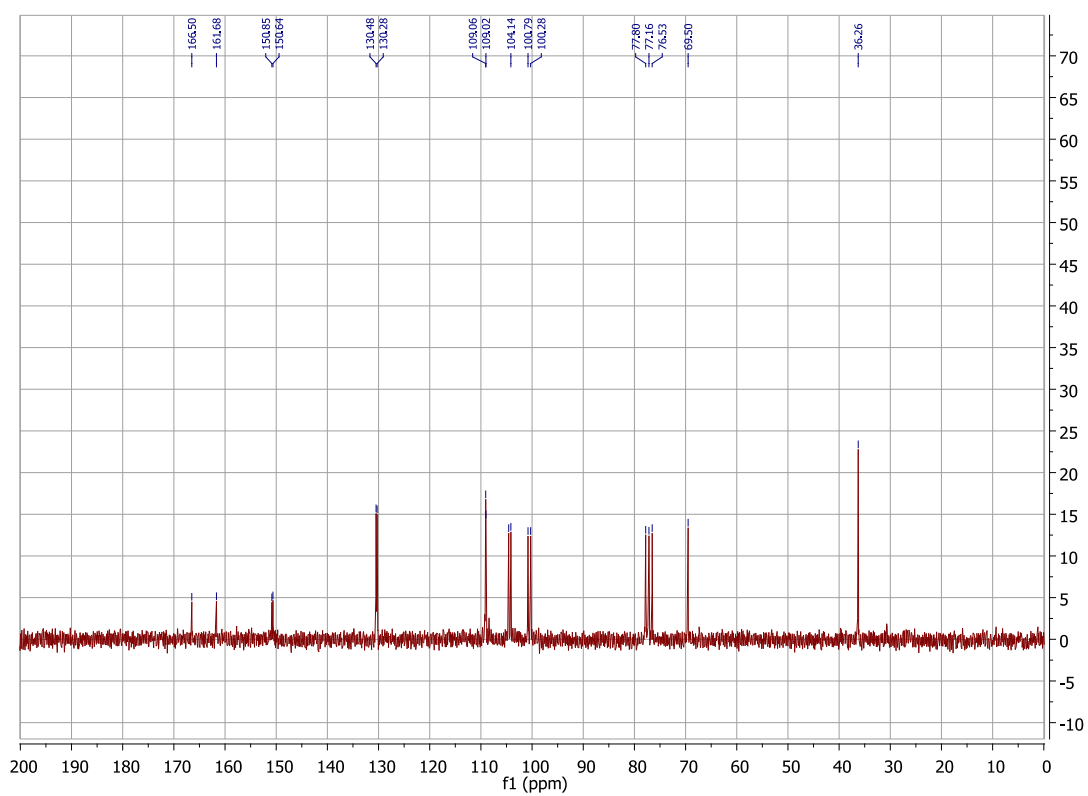

- **2f:** *N,N'*-dimethyl-*N,N'*-di-*p*-tolylmethanedi-amine

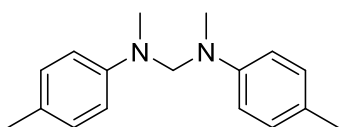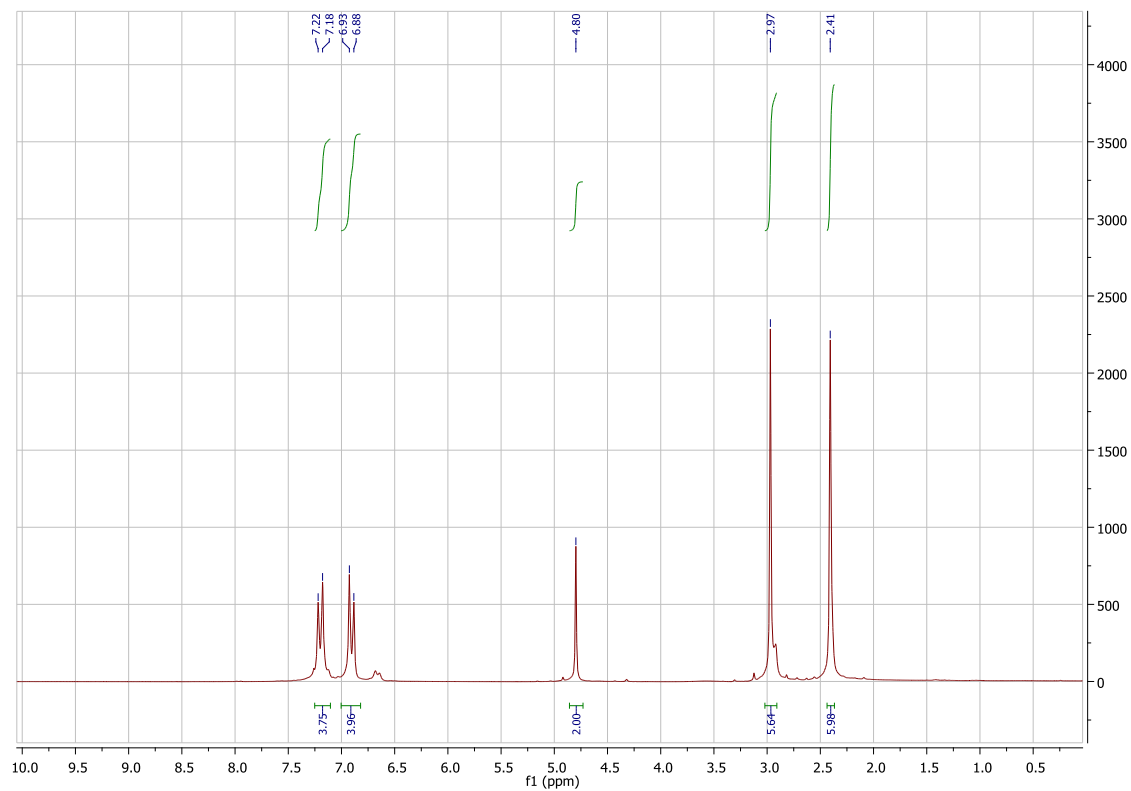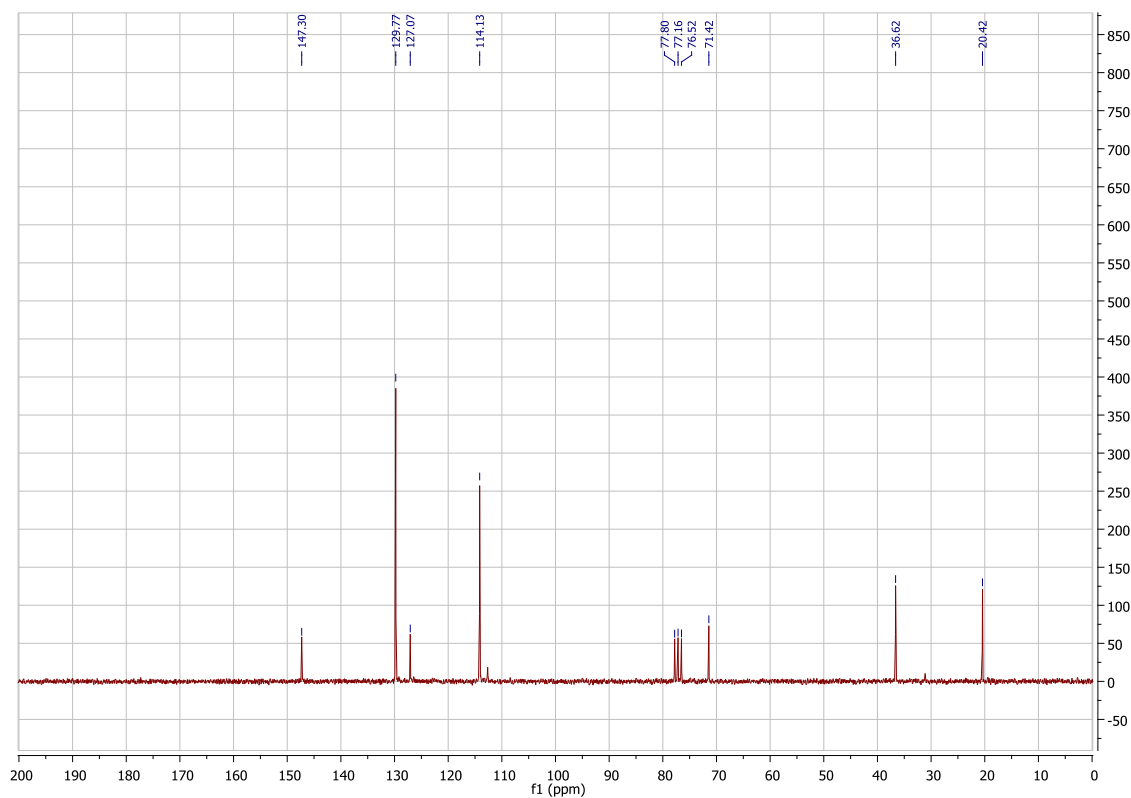

- **2h:** *N,N'*-bis(4-chlorophenyl)-*N,N'*-dimethylmethanedi-amine

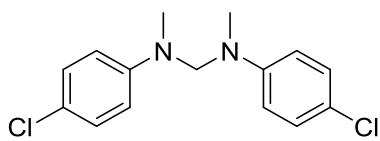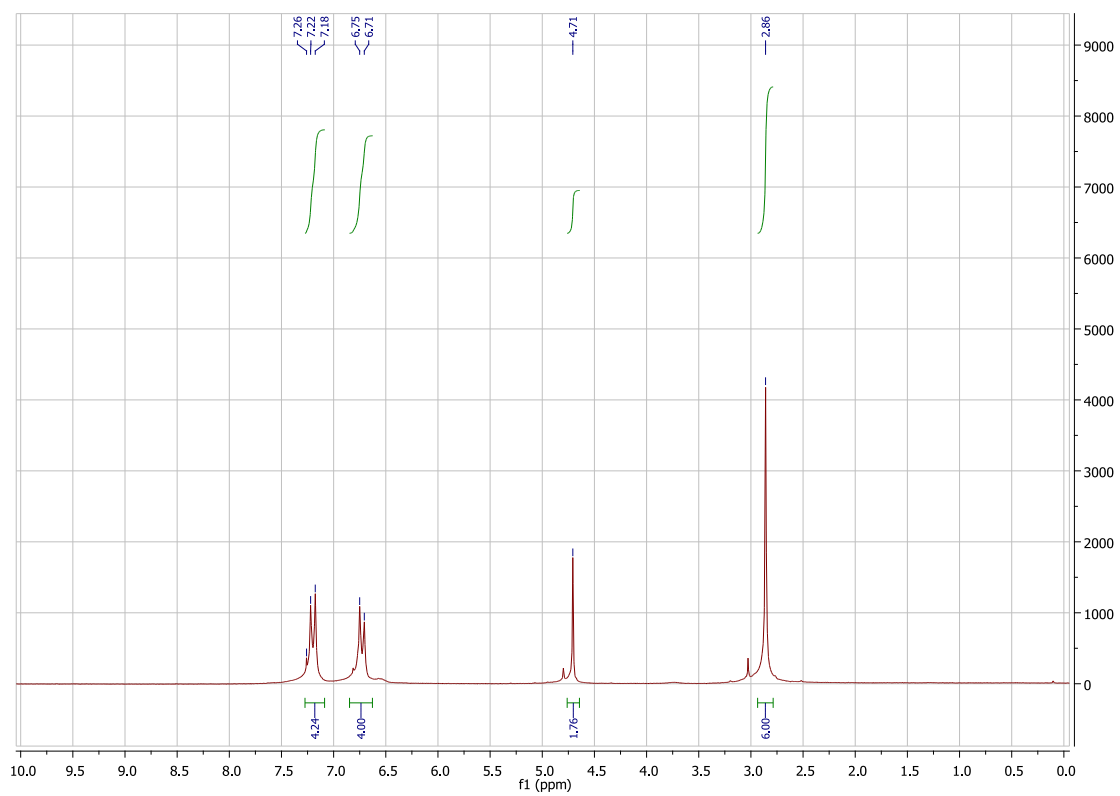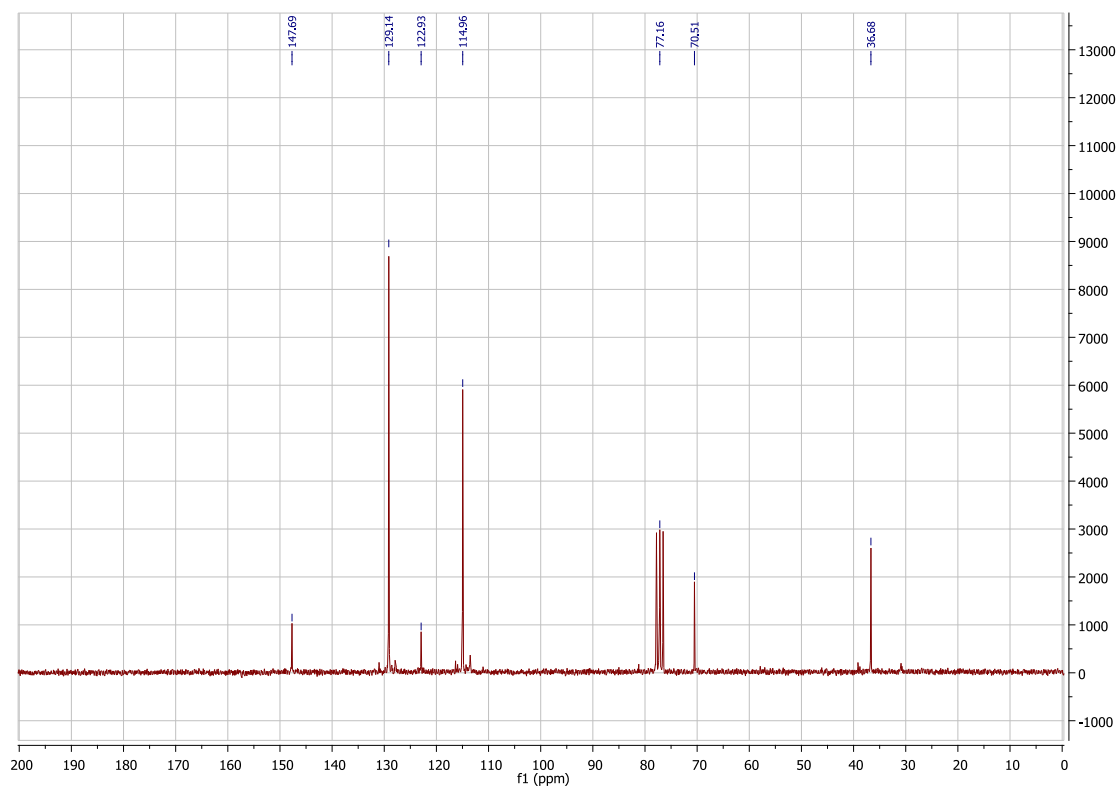

- **2i:** *N,N'*-bis(4-fluorophenyl)-*N,N'*-dimethylmethanedi-amine

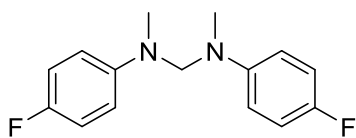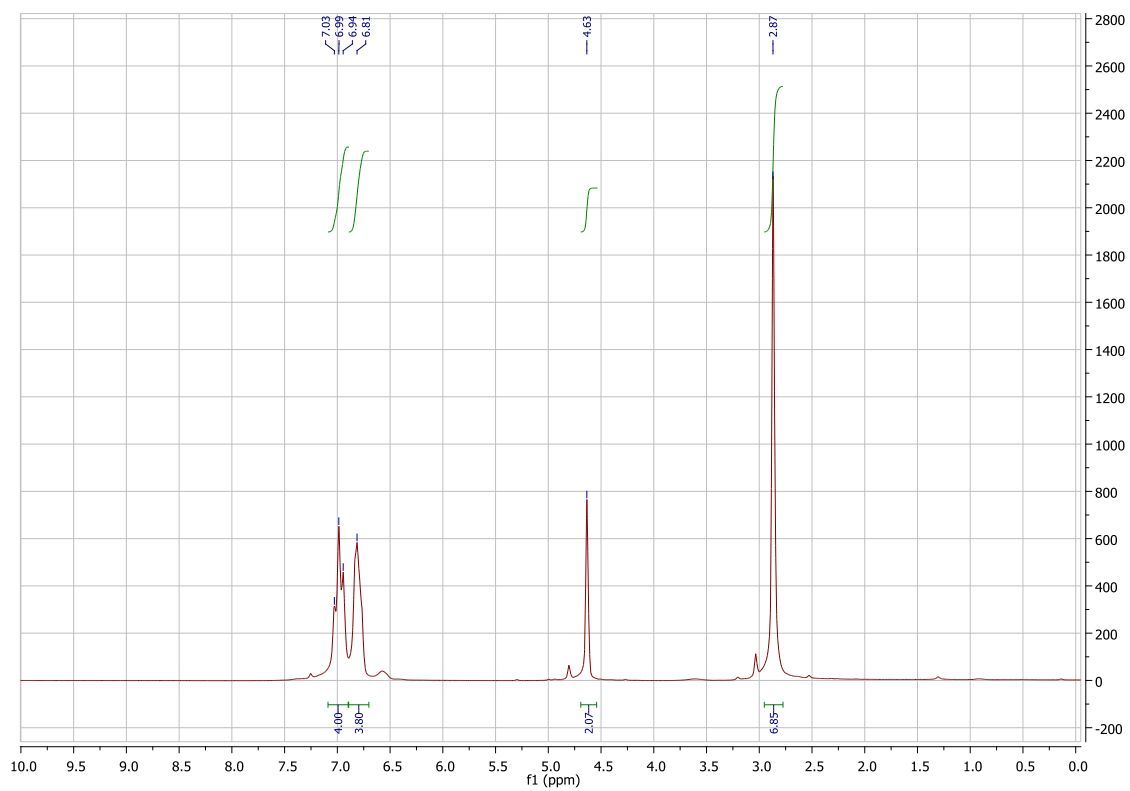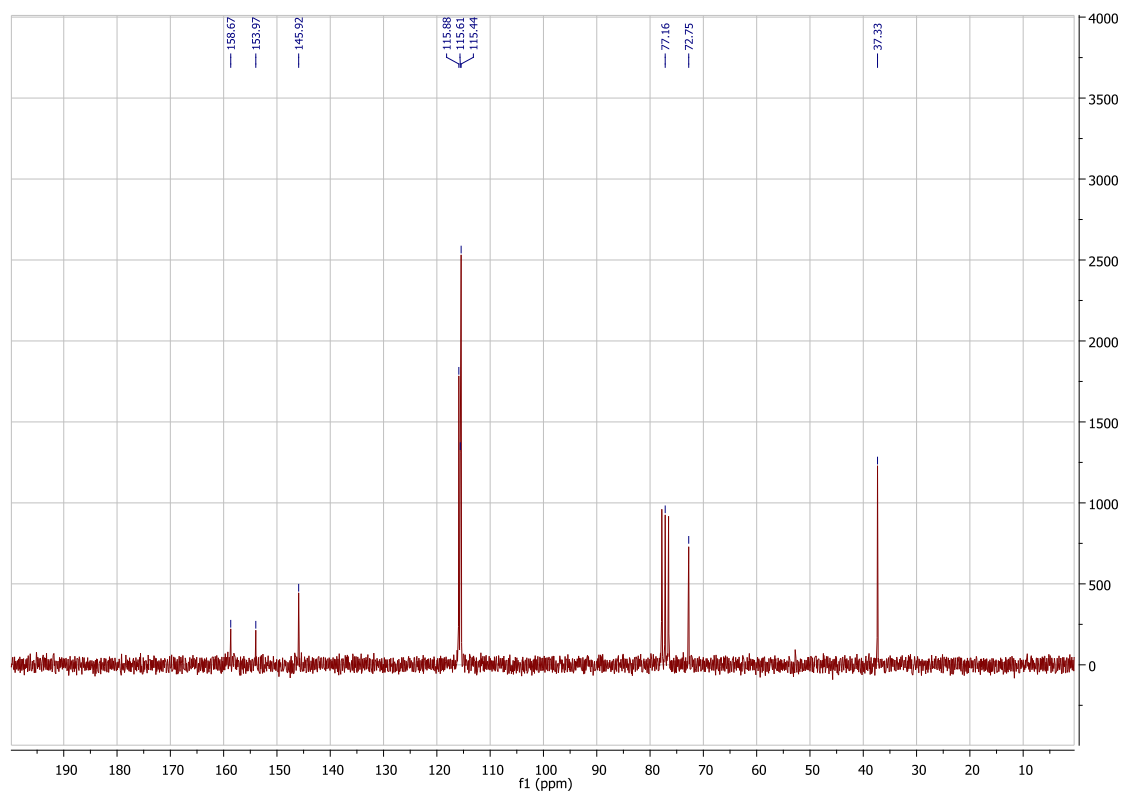

- **2j:** 4,4'-(methylenebis(methylazanediy))dibenzonitrile

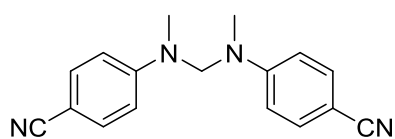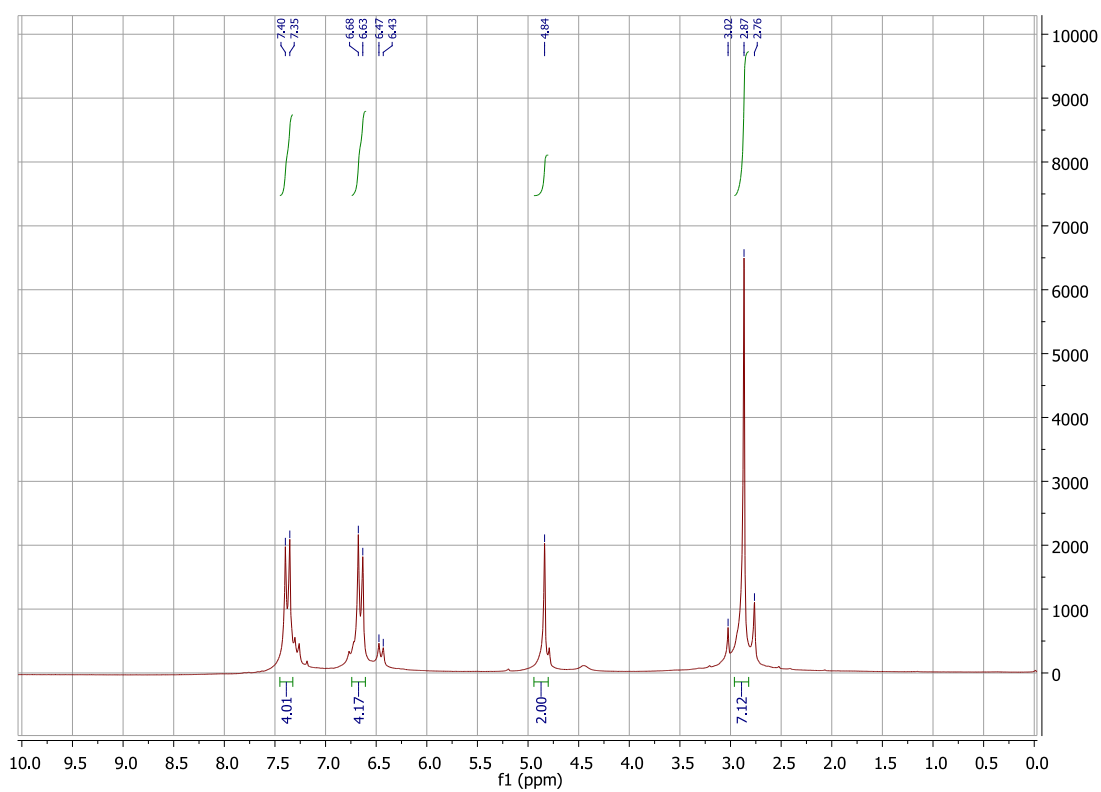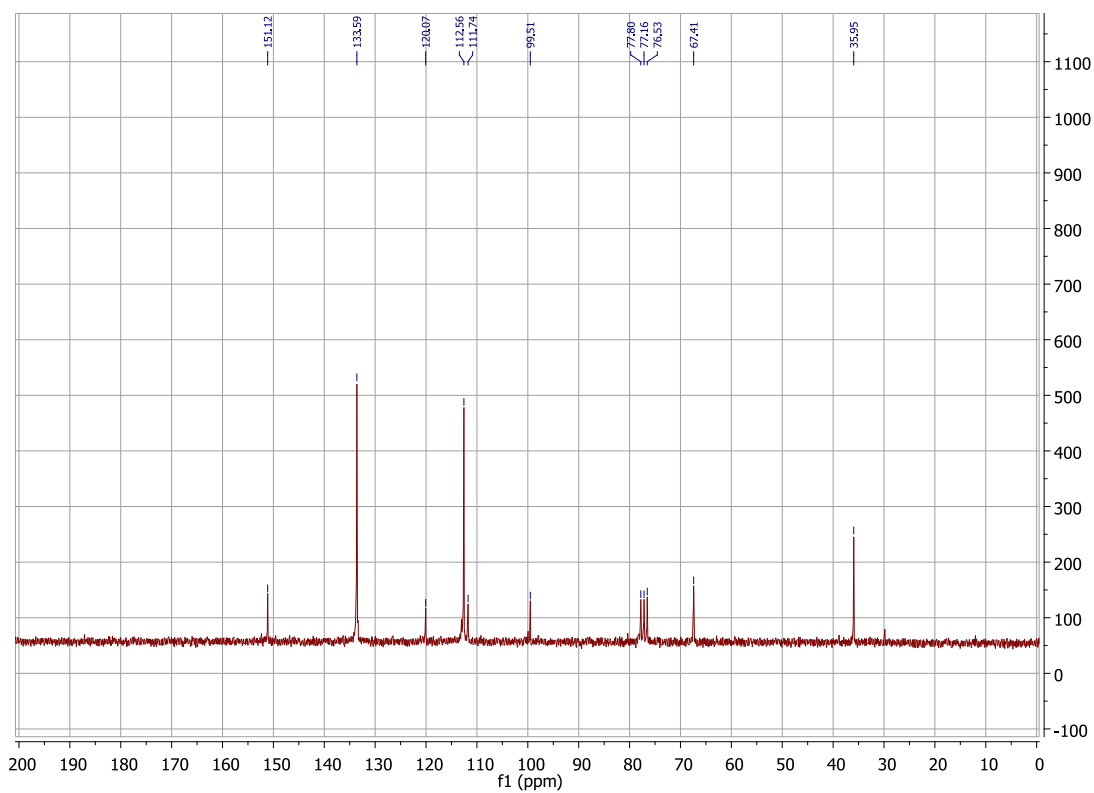

- **2k:** 1,1'-((methylenebis(methylazanediyl))bis(4,1-phenylene))bis(ethan-1-one)

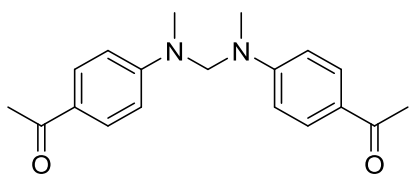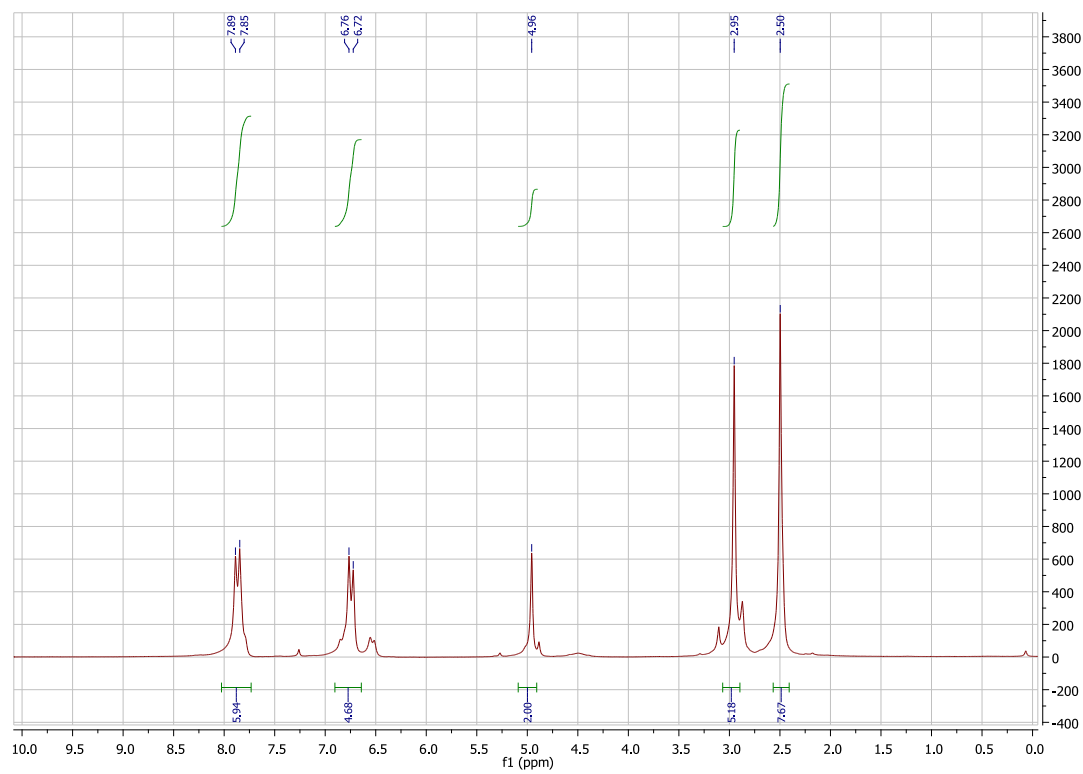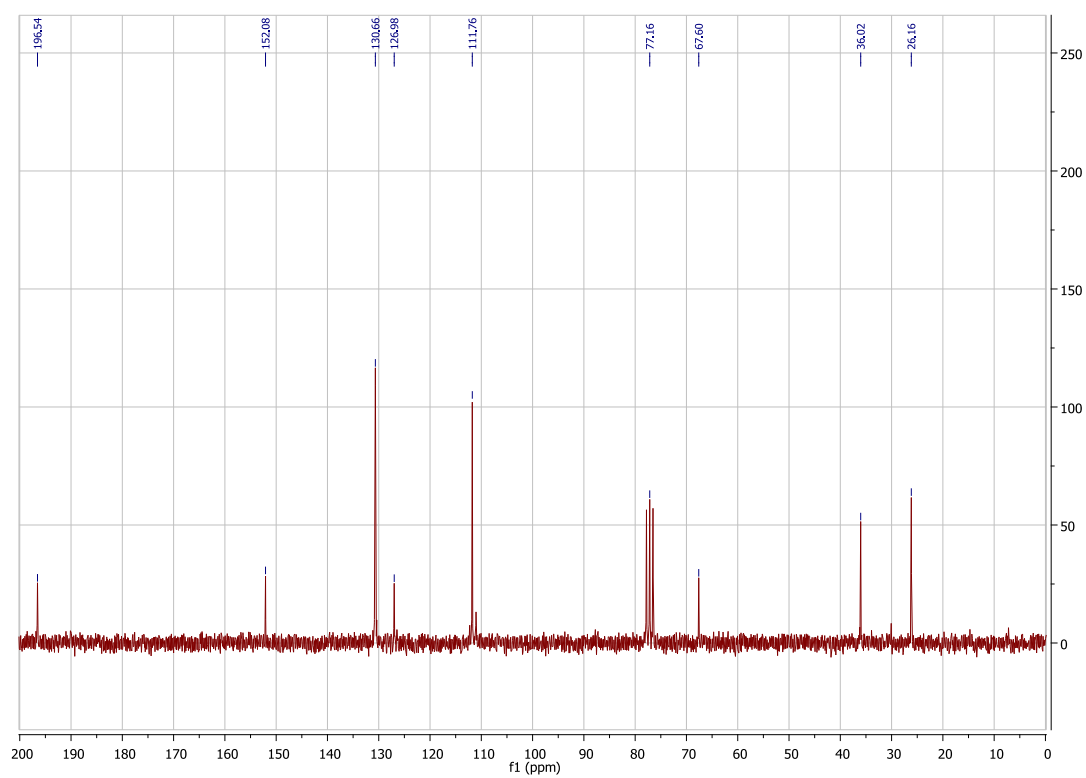



- **2l:** *N,N'*-diethyl-*N,N'*-diphenylmethanedi-amine

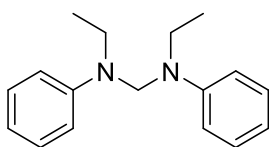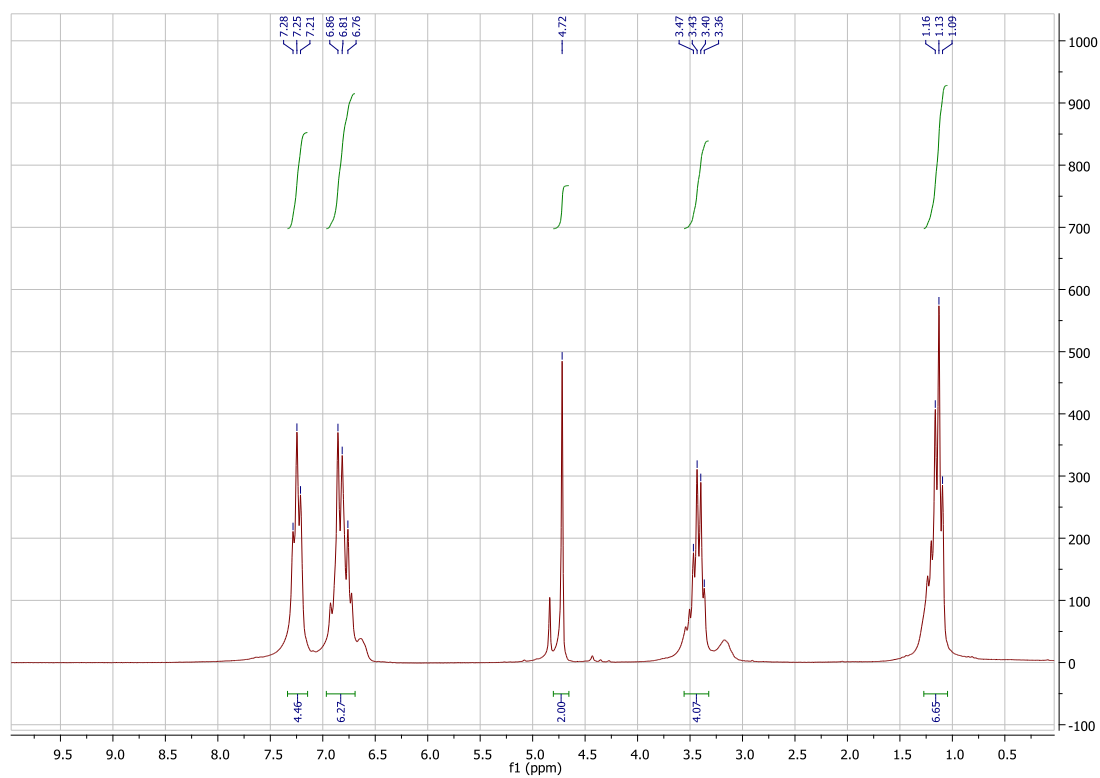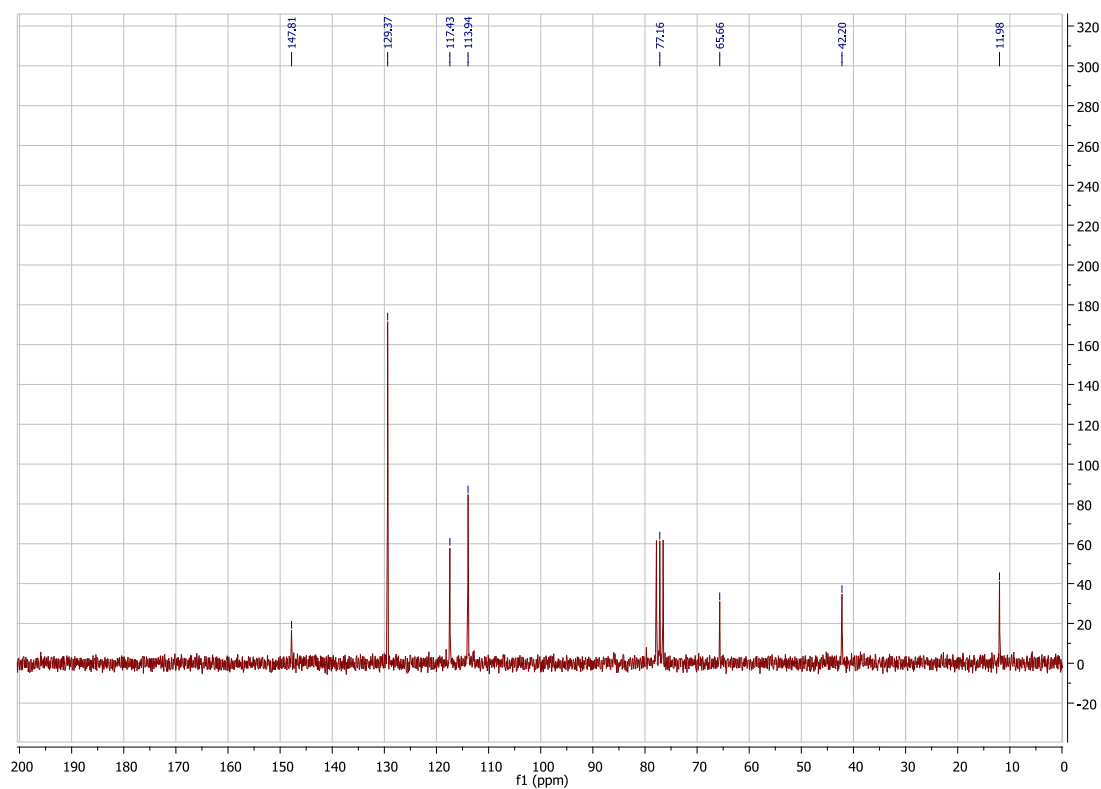

- **2m:** *N,N'*-diallyl-*N,N'*-diphenylmethanedi-amine

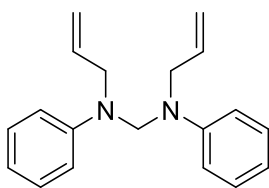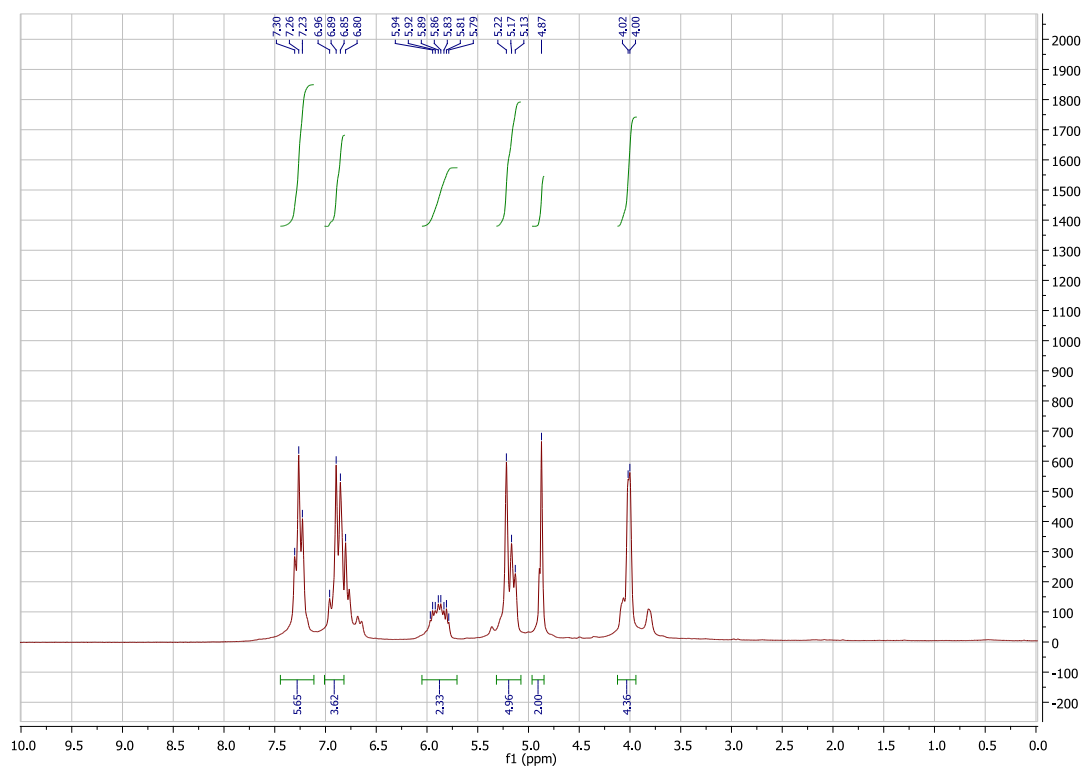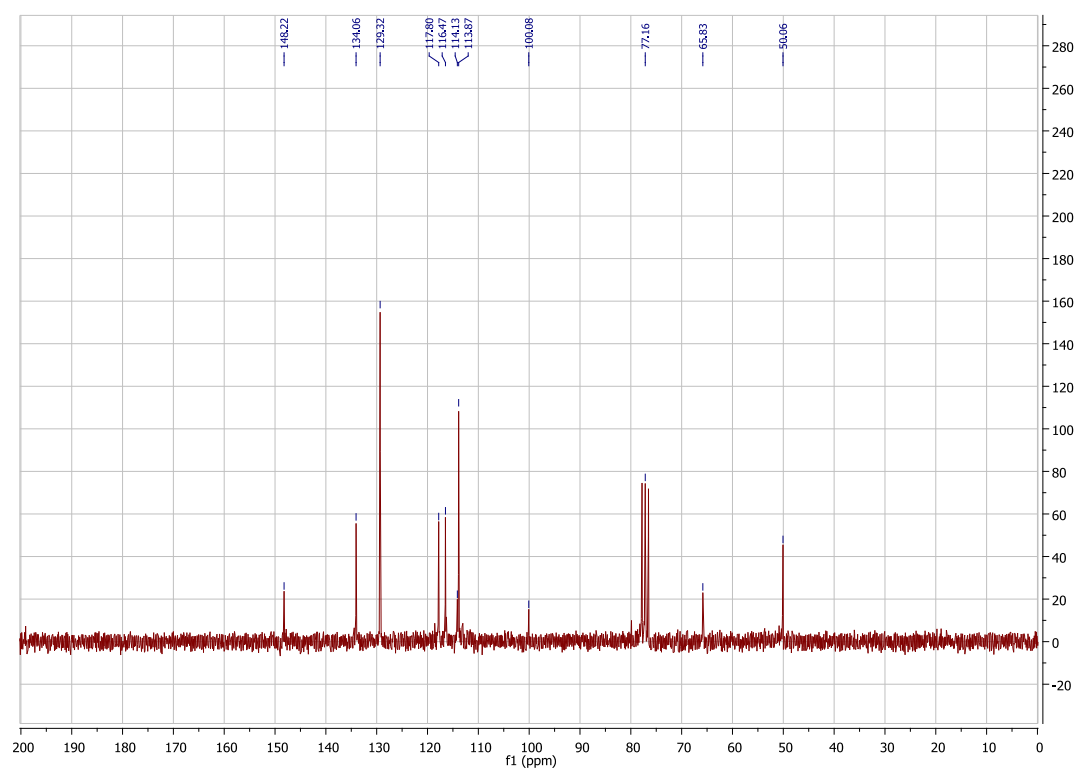

- **2p:** di(indolin-1-yl)methane

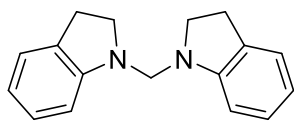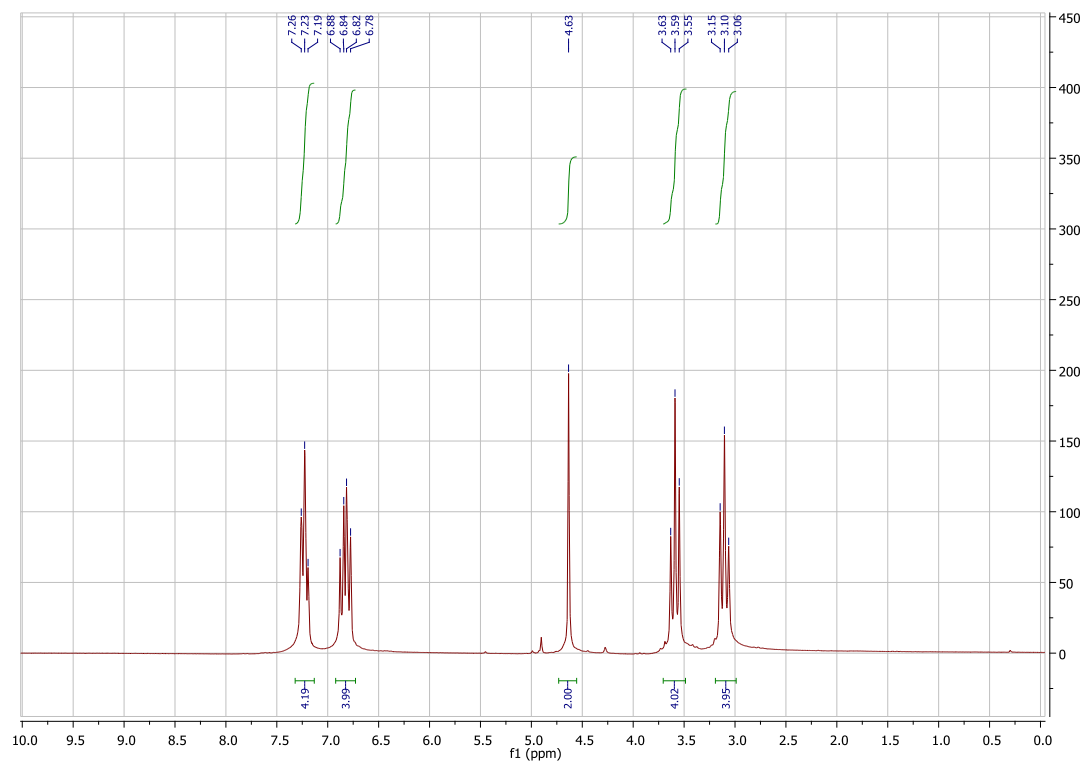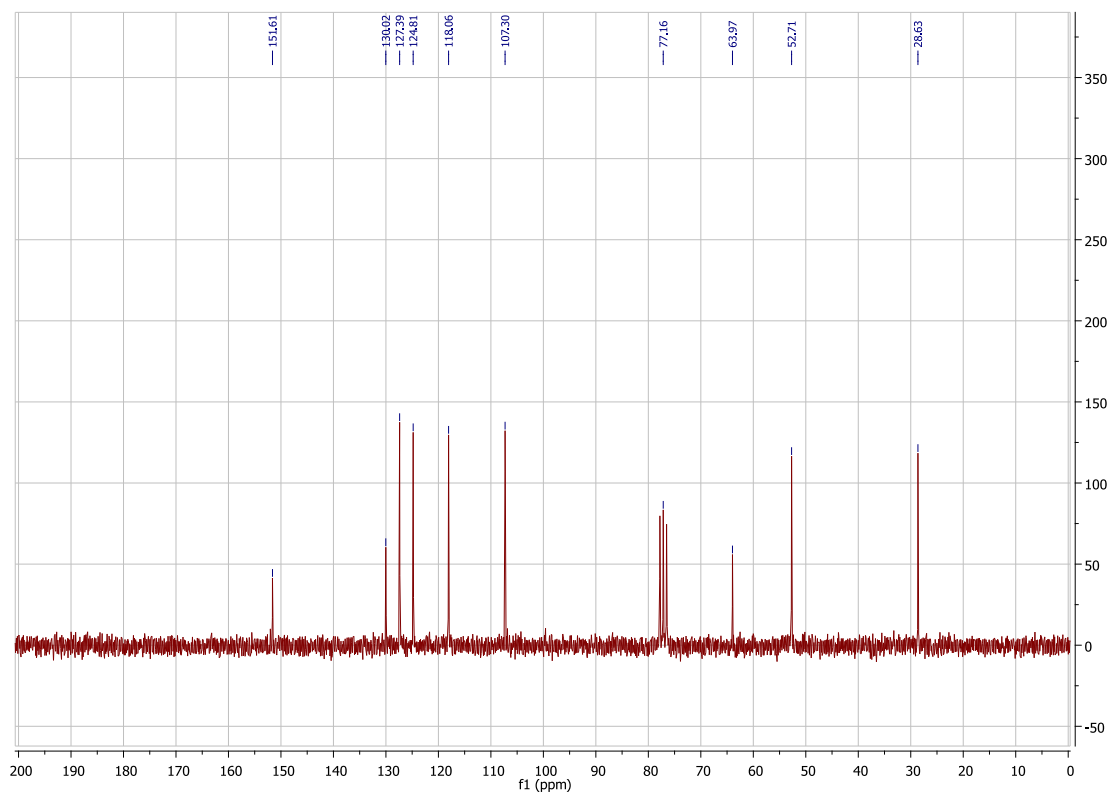

- **2q:** bis(3,4-dihydroquinolin-1(2H)-yl)methane

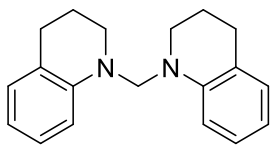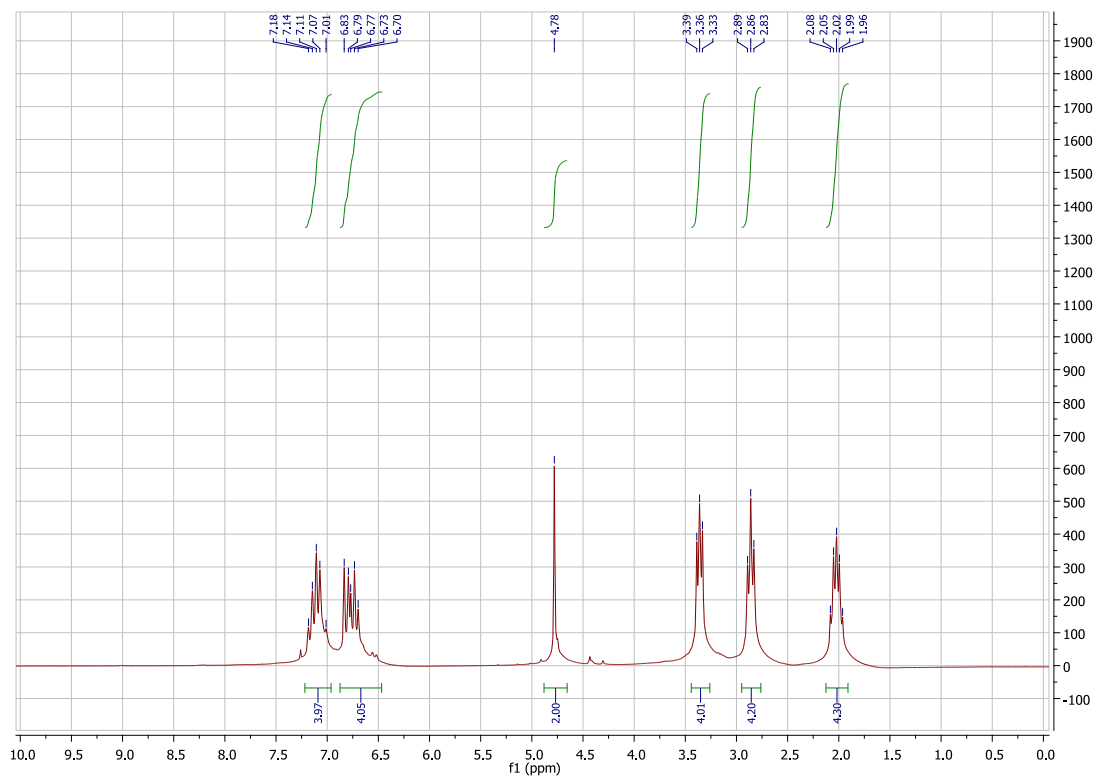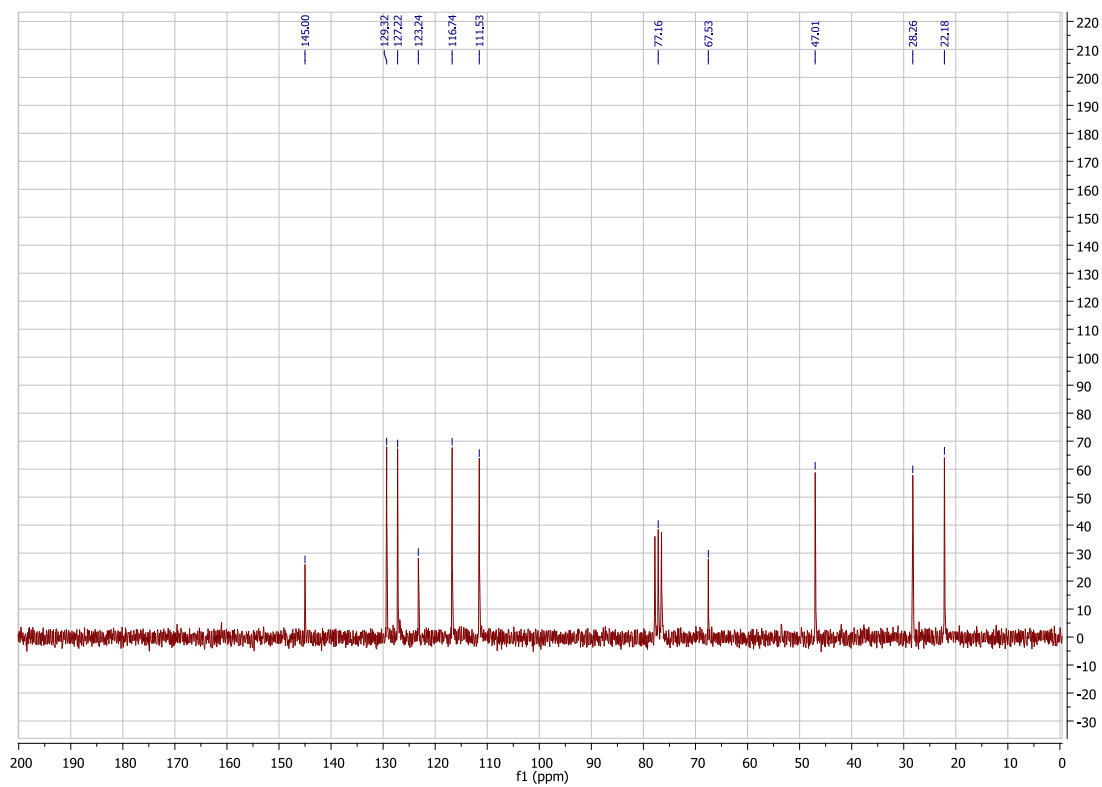

- **2s:** *N,N'*-dimethyl-*N,N'*-di(pyridin-2-yl)methanedi-amine

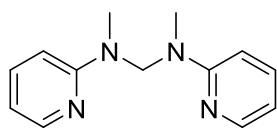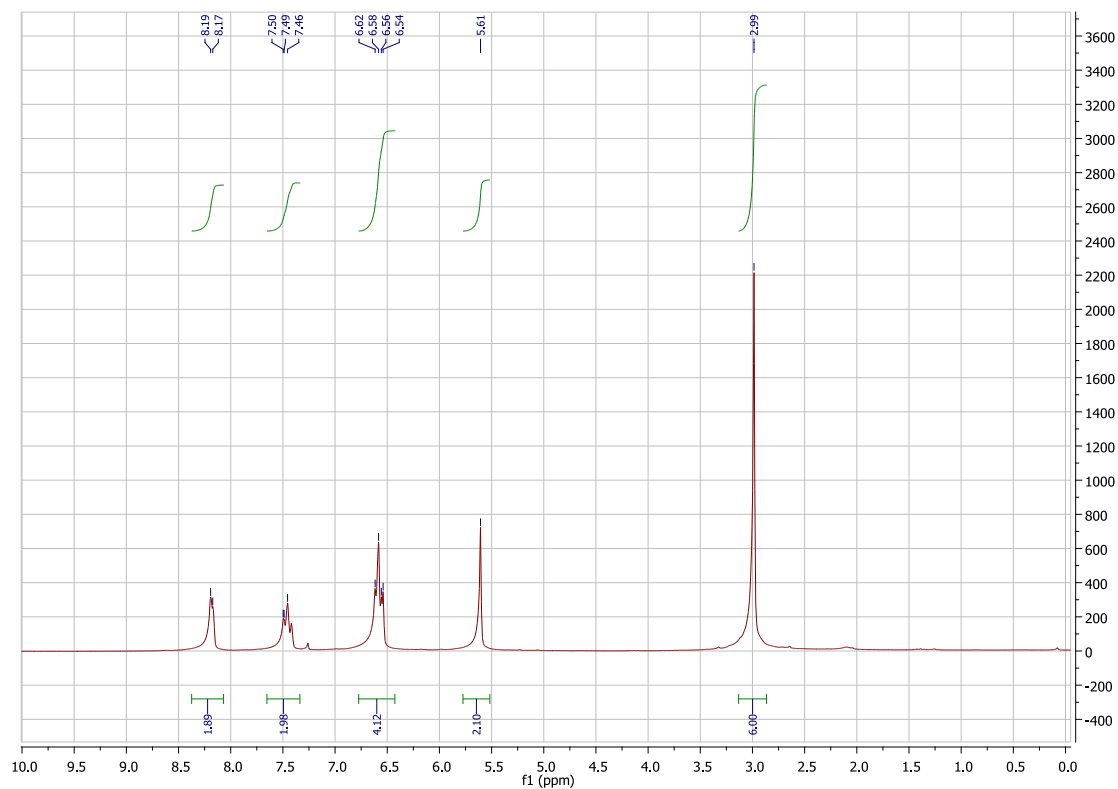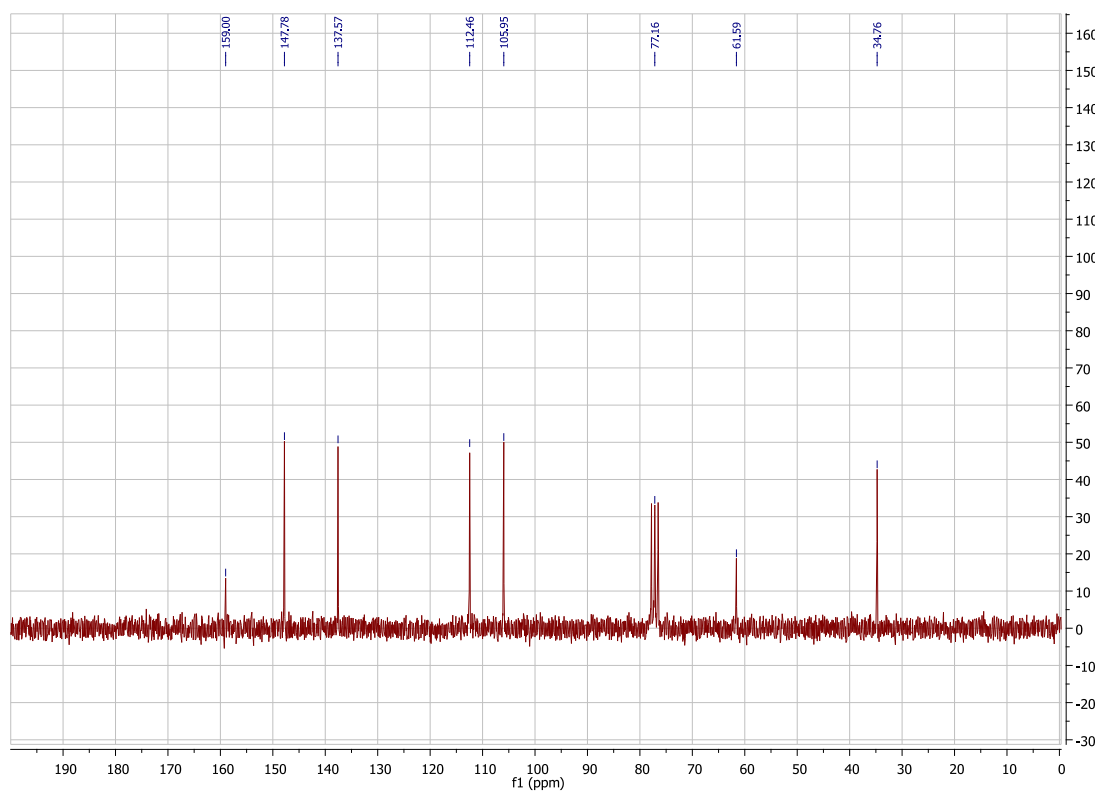

### 3.2. $^1\text{H}$ NMR spectra of crude mixture for mixed aminals

The following spectra present the NMR data of the aminals **4a**, **4b**, **4c**, **4d** and **4e**, from the crude mixture.

- **4a:** *N,N'*-dimethyl-*N'*-(*m*-tolyl)-*N*-(*p*-tolyl)methanedianiline

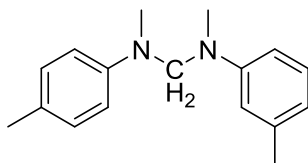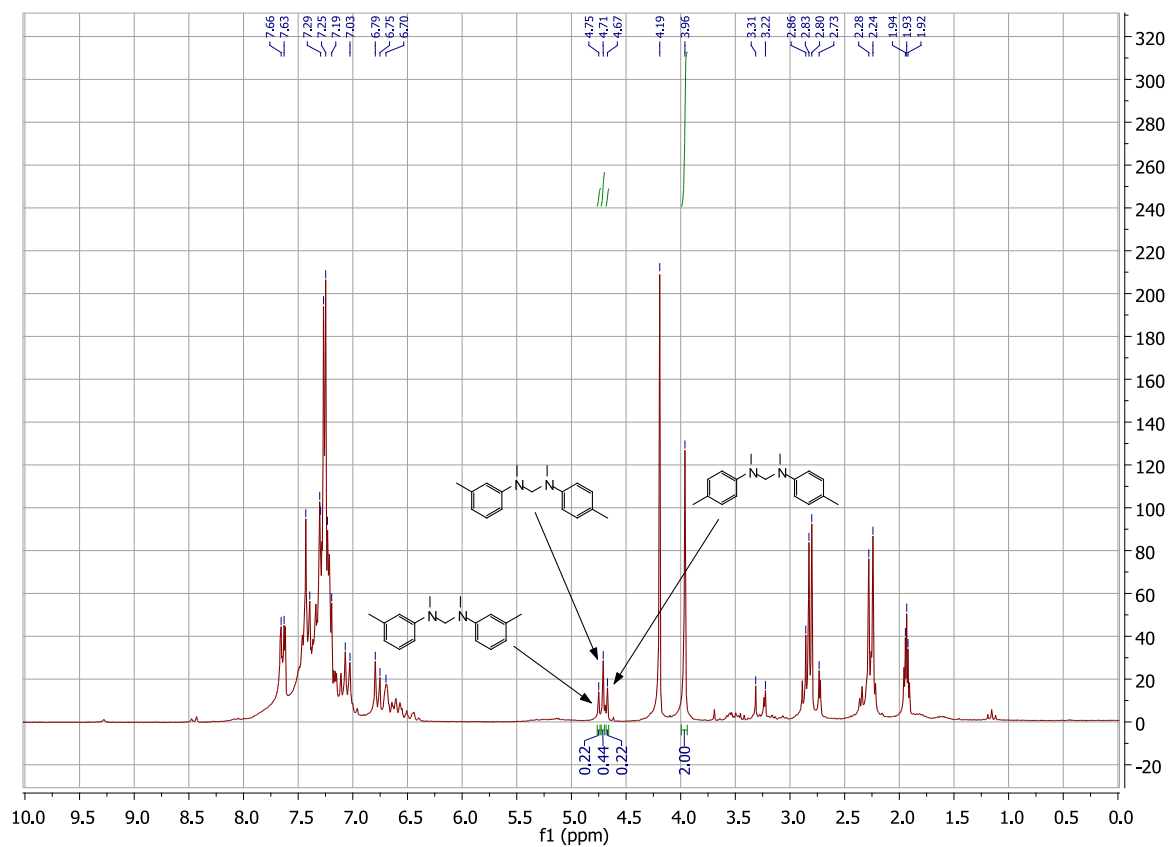

- **4b:** N-(3-fluorophenyl)-N,N'-dimethyl-N'-(p-tolyl)methanedi-amine

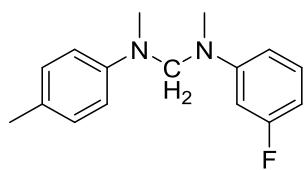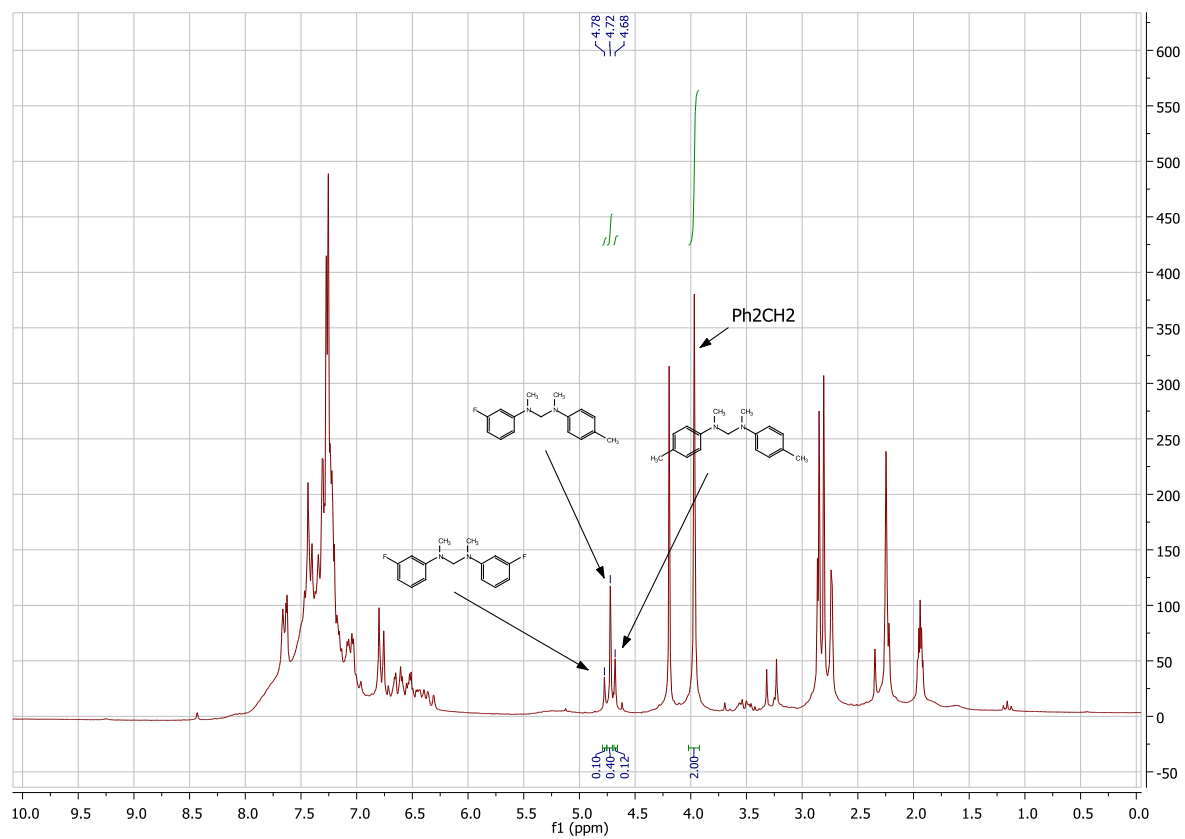

- **4c:** 1-(4-(((3,4-dihydroquinolin-1(2H)-yl)methyl)(methyl)amino)phenyl)ethan-1-one

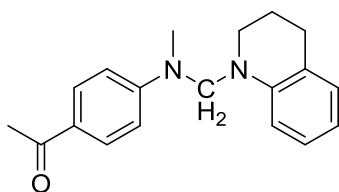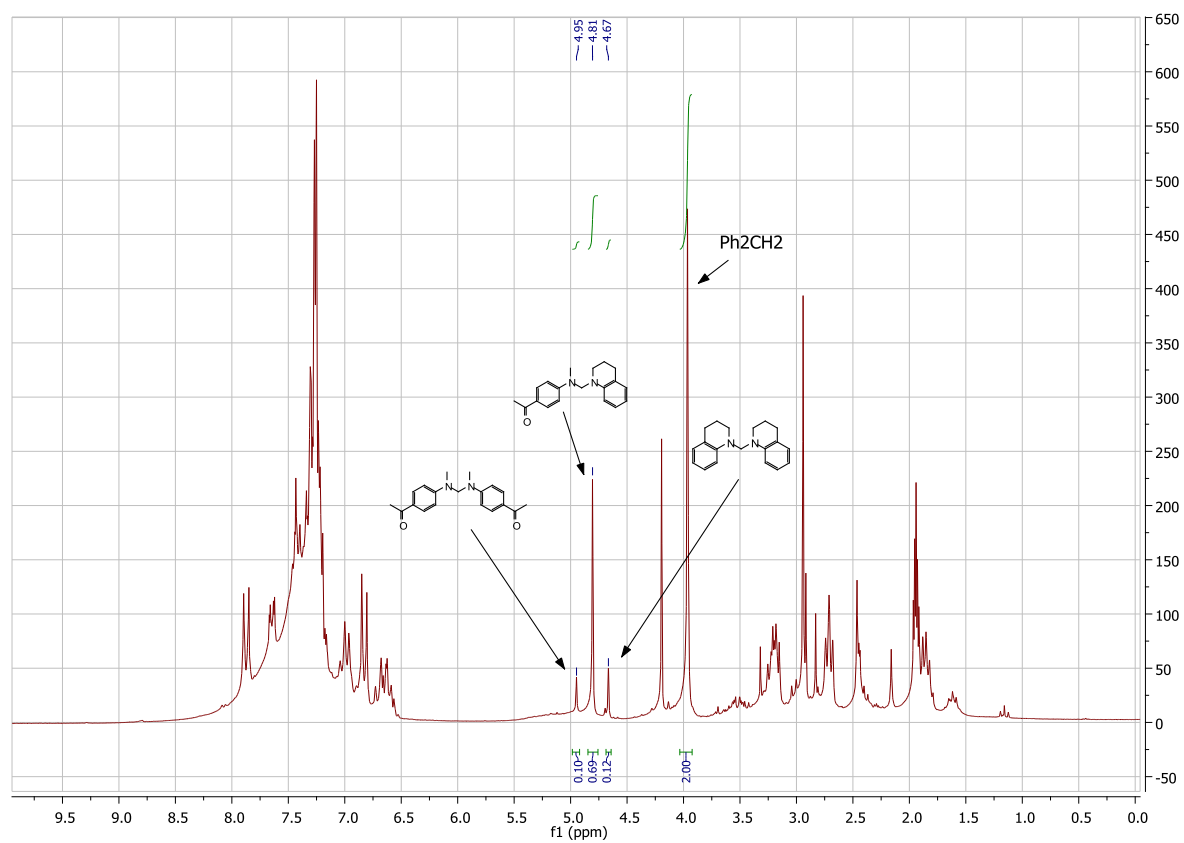



- **4d:** N,N'-dimethyl-N-phenyl-N'-(pyridin-2-yl)methanedi-amine

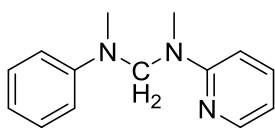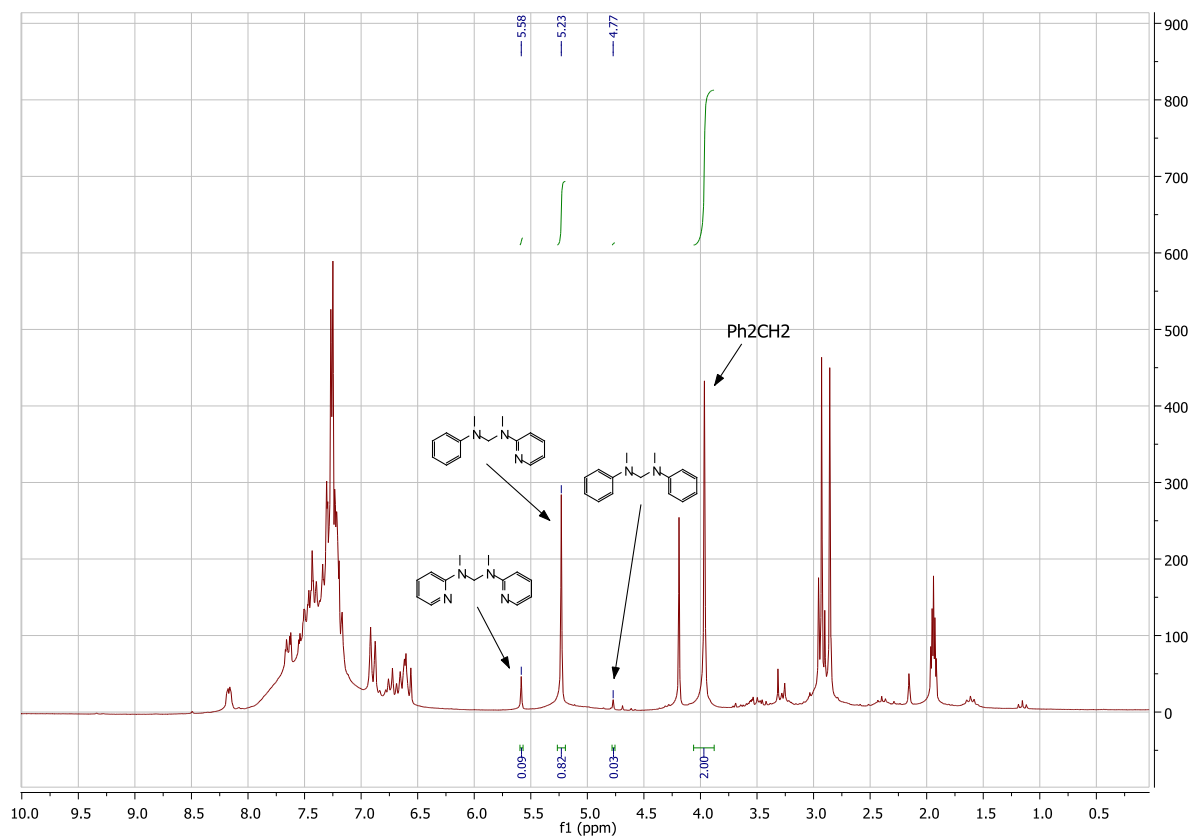

- **4e:** N,N'-dimethyl-N-phenyl-N'-(pyridin-4-yl)methanedi-amine

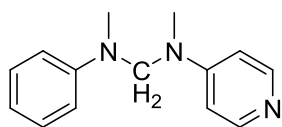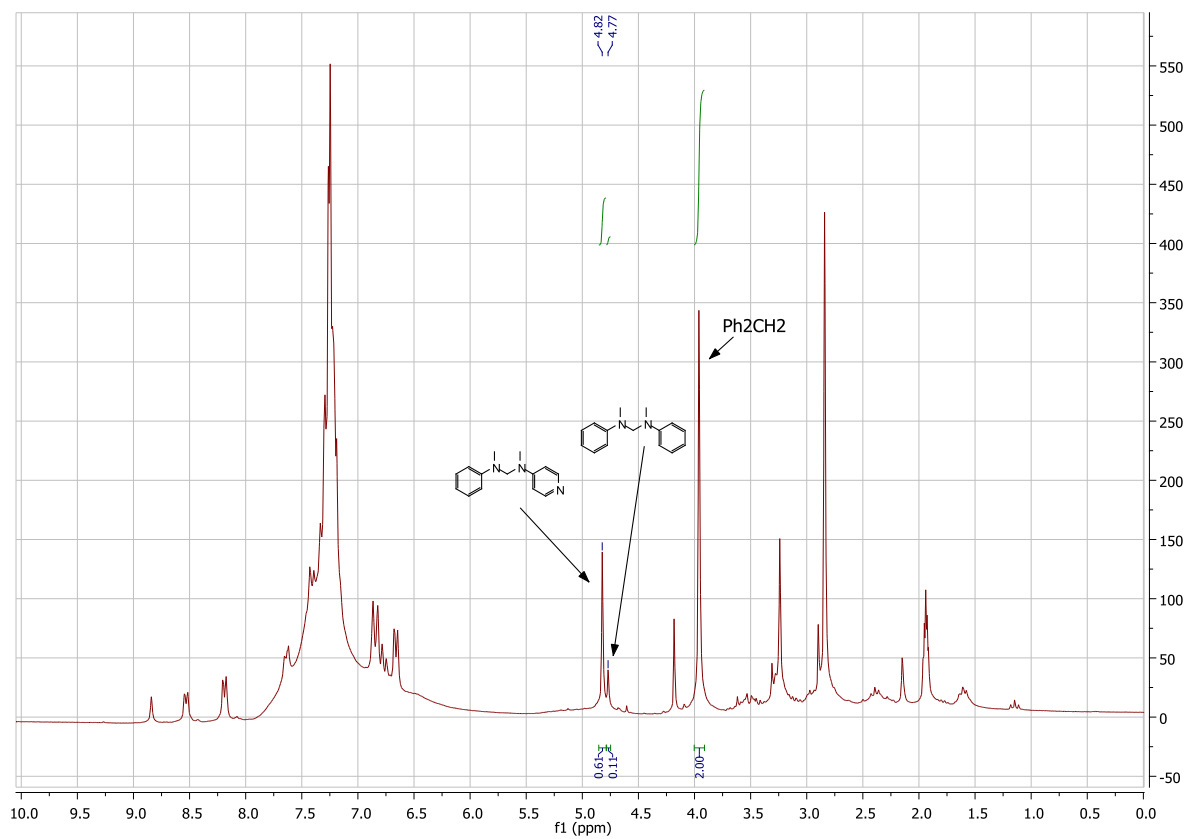

## 4. References

1. Hooft, R. W. W. *COLLECT*, Nonius BV: Delft, The Netherlands, 1998.
2. Otwinowski, Z.; Minor, W. *Methods Enzymol.* **1997**, 276, 307-326.
3. Sheldrick, G. M. *Acta Crystallogr., Sect. A* **2015**, 71, 3-8.
4. (a) Sheldrick, G. M. *Acta Crystallogr., Sect. A* **2008**, 64, 112-122. (b) Sheldrick, G. M. *Acta Crystallogr., Sect. C* **2015**, 71, 3.
5. Farrugia, L. J. *J. Appl. Crystallogr.* **1997**, 30, 565.
6. Hwang, D.-R. Uang, B.-J., *Org. Lett.* **2002**, 4, 463-466.
7. Beifuss, U.; Ledderhose, S. Ondrus, V., *Arkivoc* **2005**, 5, 147-173.
8. Khairullina, R. R.; Akmanov, B. F.; Kunakova, R. V. Ibragimov, A. G., *Russ. J. Org. Chem.* **2012**, 48, 902-907.
9. (a) Zhu, X.-Q.; Zhang, M.-T.; Yu, A.; Wang, C.-H. Cheng, J.-P., *J. Am. Chem. Soc.* **2008**, 130, 2501-2516. (b) Nelsen, S. F.; Grezzo, L. A. Hollinsed, W. C., *J. Org. Chem.* **1981**, 46, 283-289.
10. Denk, M. K.; Gupta, S.; Brownie, J.; Tajammul, S. Lough, A. J., *Chem. Eur. J.* **2001**, 7, 4477-4486.
